# Supplementary material for: Correction: Insights into the genetic epidemiology of Crohn's and rare diseases in the Ashkenazi Jewish population
Source: PLoS Genet. 2019 May 30;15(5):e1008190. doi: 10.1371/journal.pgen.1008190 (PMC6542503; doi:10.1371/journal.pgen.1008190)
Supplement: S2 Data File — (XLSX) [file pgen.1008190.s001.xlsx]

## Sheet: S2_Data File
id	enrichment	ajfreq	nfefreq	filter	annot
1:865665_G/A	6.66865	0.011199	0.0012432	MISS02	missense_variant
1:871219_C/T	12.8119	0.0036731	0.00028767	PASS	missense_variant
1:874415_C/T	4.29407	0.0097466	0.00228688	MISS02	splice_region_variant
1:874447_G/A	4.83677	0.0011809	0.000162549	MISS02	missense_variant
1:874748_T/C	11.8256	0.0011537	9.77e-05	MISS02	missense_variant
1:874762_C/T	3.76036	0.0013844	0.000368531	MISS02	missense_variant
1:883549_T/C	6.11296	0.0060946	0.0010021	MISS02	missense_variant
1:889247_G/A	22.529	0.001378	6.12e-05	PASS	missense_variant
1:891591_C/T	3.95448	0.0059743	0.00151754	PASS	missense_variant
1:892487_CA/C	12.7689	0.0022957	0.000180169	PASS	frameshift_variant
1:894330_G/A	7.71255	0.01127	0.00147573	PASS	missense_variant
1:897768_G/A	6.61893	0.0011478	1.53e-05	PASS	missense_variant
1:898869_C/T	14.7776	0.0055556	0.000377905	PASS	missense_variant
1:905901_G/A	14.6463	0.0050528	0.000320229	PASS	missense_variant
1:906351_G/A	3.14502	0.0012183	0.000374199	PASS	missense_variant
1:977462_C/T	12.1886	0.0013812	0.000113463	MISS02	missense_variant
1:979083_G/A	50.7671	0.0016085	3.17e-05	PASS	missense_variant
1:981345_C/T	3.89887	0.0011489	0.00012191	PASS	splice_region_variant
1:982722_A/G	3.07485	0.029453	0.0097729	MISS02	missense_variant
1:983222_G/A	10.3333	0.0014486	0.000125282	MISS02	missense_variant
1:989155_C/T	7.71035	0.0016241	0.000210937	MISS02	missense_variant
1:989216_C/T	11.5711	0.0060437	0.00052521	MISS02	missense_variant
1:1018307_G/T	5.96991	0.001704	0.000285837	MISS02	stop_gained
1:1022534_C/T	4.5981	0.0016189	0.000352526	MISS02	frameshift_variant
1:1115602_G/A	10.3827	0.028619	0.00282959	MISS02	missense_variant
1:1116183_G/A	10.7837	0.0070855	0.000661306	MISS02	missense_variant
1:1118250_C/G	4.24599	0.017677	0.00422026	PASS	splice_region_variant
1:1118412_C/T	6.41115	0.0021378	0.000334053	MISS02	missense_variant
1:1139150_G/A	8.16779	0.0011261	0.000138007	PASS	missense_variant
1:1139865_C/T	4.4472	0.0013787	0.000310347	PASS	splice_region_variant
1:1140871_G/A	10.6799	0.028806	0.00276951	MISS02	splice_region_variant
1:1163884_C/T	8.65598	0.0016348	0.000189137	PASS	missense_variant
1:1164073_G/A	12.0818	0.0045998	0.000382333	PASS	missense_variant
1:1178825_C/T	4.4297	0.0046239	0.00104759	PASS	splice_region_variant
1:1221332_G/A	3.32055	0.0012338	0.000371885	PASS	missense_variant
1:1221409_G/A	5.13117	0.031972	0.00639557	PASS	missense_variant
1:1221496_C/T	3.8649	0.0048883	0.000538771	MISS02	missense_variant
1:1222269_C/T	5.30632	0.0036765	0.00069218	PASS	missense_variant
1:1222332_C/T	7.01134	0.0071859	0.00103125	MISS02	missense_variant
1:1222630_G/A	17.6541	0.0090951	0.000519642	MISS02	missense_variant
1:1222679_G/A	10.9137	0.002322	0.000213211	PASS	missense_variant
1:1223178_G/A	5.25959	0.0043011	0.000820622	PASS	missense_variant
1:1226748_G/A	12.3625	0.0013941	0.000112914	MISS02	missense_variant
1:1226769_C/T	18.1336	0.003985	0.000220588	MISS02	missense_variant
1:1244831_T/C	22.4065	0.0023697	0.000106	MISS02	splice_region_variant
1:1246319_G/A	14.0367	0.032191	0.00236403	PASS	missense_variant
1:1254623_G/A	10.547	0.0016099	0.000152863	PASS	missense_variant
1:1259991_T/C	3.14366	0.0023063	0.00073479	MISS02	missense_variant
1:1262832_C/T	6.25117	0.0020196	9.08e-05	PASS	missense_variant
1:1268293_G/A	3.70566	0.0016811	0.000435146	MISS02	splice_region_variant
1:1269038_G/A	8.24774	0.0011494	0.0001395	PASS	missense_variant
1:1271649_A/G	5.44138	0.0044223	0.000480584	PASS	missense_variant
1:1271710_C/A	4.61649	0.0043988	0.000956141	PASS	missense_variant
1:1271808_C/A	14.1594	0.0067114	0.000476964	MISS02	missense_variant
1:1271829_G/A	13.6001	0.0029131	0.000214777	PASS	missense_variant
1:1273474_G/A	67.1931	0.0011754	1.75e-05	MISS02	missense_variant
1:1277068_T/C	20.7114	0.0018391	4.72e-05	PASS	missense_variant
1:1309454_TGTG/T	12.8022	0.0011505	9e-05	PASS	inframe_deletion
1:1322754_G/A	13.8111	0.0020661	0.000149885	PASS	missense_variant
1:1372871_G/A	13.8486	0.002176	0.000157446	MISS02	splice_region_variant
1:1396146_G/A	14.6258	0.0020979	0.000143719	MISS02	missense_variant
1:1417596_A/G	9.71267	0.009447	0.00098096	MISS02	missense_variant
1:1423256_A/G	3.93181	0.0052801	0.000767934	PASS	missense_variant
1:1425971_G/A	5.71384	0.0023354	0.000409516	MISS02	missense_variant
1:1431170_C/G	21.9568	0.0065623	0.000300757	MISS02	missense_variant
1:1455586_C/T	10.7223	0.0041513	0.000388626	MISS02	missense_variant
1:1469423_G/A	8.91306	0.002301	0.000258689	PASS	missense_variant
1:1550992_C/A	3.71018	0.028349	0.00780244	PASS	stop_gained
1:1551987_C/G	3.28252	0.0021053	0.000642307	PASS	missense_variant
1:1558792_T/C	3.01048	0.97962	0.941061	MISS02	start_lost
1:1558831_A/G	7.8266	0.0014231	0.000182055	MISS02	missense_variant
1:1559292_C/T	23.0191	0.0057657	0.000251864	MISS02	missense_variant
1:1559293_C/A	11.5812	0.0048432	0.000420055	MISS02	missense_variant
1:1563187_G/A	10.6071	0.0034722	0.000328379	MISS02	missense_variant
1:1634928_C/T	6.54544	0.0092063	0.00141758	VQSRTrancheSNP99.60to99.80EXAC	missense_variant
1:1685804_T/A	8.11671	0.0078161	0.000969609	PASS	missense_variant
1:1688309_C/A	11.8453	0.0018408	0.000155666	MISS05	missense_variant
1:1688559_G/A	4.22694	0.0027533	0.000652742	PASS	missense_variant
1:1847952_G/A	3.40309	0.0062741	0.00114862	MISS02	missense_variant
1:1849479_C/T	11.3431	0.0052801	0.000467741	PASS	missense_variant
1:1854854_CG/C	4.84128	0.0044709	0.000492201	MISS02	missense_variant
1:1857243_C/G	9.37306	0.0011515	0.000122979	PASS	missense_variant
1:1888168_G/A	5.99995	0.0048365	0.000640545	PASS	missense_variant
1:1902092_C/T	5.08822	0.00516	0.000648553	MISS02	splice_region_variant
1:1961512_C/T	3.15948	0.0025641	0.000812982	DIFFMISS	missense_variant
1:2105407_A/G	15.2508	0.0013793	9.06e-05	PASS	missense_variant
1:2121160_G/A	11.936	0.0018374	0.000154197	PASS	missense_variant
1:2316472_C/T	4.64033	0.0052808	0.00114276	MISS02	missense_variant
1:2327236_G/A	26.8439	0.001607	6e-05	PASS	missense_variant
1:2338015_T/C	3.15965	0.081797	0.0274211	PASS	missense_variant
1:2338308_C/T	10.8092	0.012138	0.00113544	MISS02	missense_variant
1:2418765_G/A	18.0696	0.0032169	0.00017001	PASS	missense_variant
1:2428056_CAGA/C	13.3885	0.0071726	0.00053931	MISS02	inframe_deletion
1:2428968_G/A	6.92143	0.0053551	0.00077726	PASS	missense_variant
1:2429985_G/A	14.6298	0.010829	0.000747747	MISS02	missense_variant
1:2436312_G/A	11.3154	0.001956	0.00017317	MISS02	missense_variant
1:2436408_G/A	5.82635	0.024527	0.00429697	PASS	missense_variant
1:2436633_T/C	5.79649	0.0084522	0.00146843	PASS	missense_variant
1:2441500_C/A	8.57221	0.001385	0.000161766	MISS02	missense_variant
1:2452750_G/A	10.797	0.0039027	0.000362746	PASS	missense_variant
1:2453260_G/A	10.1025	0.0013787	0.000136641	PASS	missense_variant
1:2488123_G/C	10.0025	0.0052481	0.00052717	MISS02	missense_variant
1:2520016_TTGTC/T	4.90854	0.0036731	0.000750503	PASS	frameshift_variant
1:2523018_C/T	7.97511	0.0013774	7.53e-05	PASS	missense_variant
1:2524280_C/T	15.7094	0.0080534	0.000516545	PASS	missense_variant
1:2525378_C/T	3.11643	0.0082624	0.0026662	MISS02	missense_variant
1:2530087_C/T	6.7829	0.0018399	0.000271682	PASS	splice_region_variant
1:3102793_G/A	7.98428	0.0076248	0.000961389	PASS	missense_variant
1:3301728_C/G	15.2281	0.0027586	0.00018162	PASS	missense_variant
1:3328278_C/T	15.5524	0.0021176	0.00013643	PASS	missense_variant
1:3328568_G/A	12.4026	0.002068	0.000167056	PASS	missense_variant
1:3329187_G/C	16.2316	0.0039172	0.000242222	PASS	missense_variant
1:3334497_C/T	16.7225	0.002301	0.000137897	PASS	missense_variant
1:3334513_C/T	10.8631	0.0011515	6.19e-05	PASS	missense_variant
1:3342611_G/A	13.3258	0.010668	0.000808533	DIFFMISS	splice_region_variant
1:3347514_G/GGAC	11.6249	0.0092123	0.000799194	PASS	missense_variant
1:3395079_G/A	17.4908	0.0016107	9.22e-05	PASS	missense_variant
1:3396465_C/T	13.3186	0.0034514	0.000259971	PASS	stop_gained
1:3412472_C/T	6.35685	0.0039738	0.000215003	MISS02	missense_variant
1:3413690_G/A	7.3003	0.001552	0.000212879	PASS	splice_region_variant
1:3416272_C/T	12.4988	0.0011871	9.51e-05	MISS02	missense_variant
1:3421843_GCCACGC/G	25.276	0.0016151	6.4e-05	MISS02	inframe_deletion
1:3431168_G/A	5.69284	0.014566	0.00258975	PASS	missense_variant
1:3431191_C/T	3.5941	0.0057054	0.001594	PASS	missense_variant
1:3548122_G/A	3.61412	0.014325	0.00400512	MISS02	missense_variant
1:3550042_C/G	3.49519	0.0014085	0.00023206	MISS02	missense_variant
1:3553560_C/T	16.2647	0.021419	0.00134392	PASS	missense_variant
1:3649488_G/A	13.6086	0.0051139	0.000377572	MISS02	missense_variant
1:3673462_C/T	9.66706	0.0011601	0.00012013	MISS02	splice_region_variant
1:3679874_A/C	5.84667	0.0020161	0.000345406	MISS02	missense_variant
1:3683159_A/C	5.1353	0.028696	0.00572017	PASS	missense_variant
1:3701698_C/T	20.4138	0.0018683	9.17e-05	MISS02	missense_variant
1:3753905_G/A	8.16207	0.0013774	0.00016896	PASS	missense_variant
1:3754043_C/T	4.64366	0.001607	0.000209996	PASS	missense_variant
1:3756281_T/C	10.0837	0.0043658	0.000434665	PASS	missense_variant
1:3761487_C/G	10.0948	0.0043698	0.000434587	PASS	missense_variant
1:3782319_G/A	20.0455	0.0018365	9.18e-05	PASS	splice_region_variant
1:3786175_T/C	11.0381	0.0018561	0.000168438	PASS	missense_variant
1:3786176_C/T	11.0165	0.0018519	0.000168386	PASS	missense_variant
1:5924544_G/A	4.63573	0.002592	0.000560274	MISS02	missense_variant
1:5934950_C/T	10.8353	0.003908	0.000361958	PASS	missense_variant
1:5940228_C/A	15.741	0.023073	0.00149816	PASS	missense_variant
1:5969237_G/A	3.48491	0.0018913	0.000543444	MISS02	missense_variant
1:5969253_G/A	10.3984	0.0021167	0.000203951	MISS02	stop_gained
1:6196705_G/A	17.983	0.016828	0.000950886	PASS	splice_region_variant
1:6206387_C/G	4.68559	0.0048276	0.00103424	PASS	missense_variant
1:6209058_GTCC/G	7.20719	0.0031056	0.000217887	MISS02	inframe_deletion
1:6278401_G/A	15.278	0.0057392	0.000377678	PASS	missense_variant
1:6311481_G/A	15.171	0.0022967	0.000151713	PASS	missense_variant
1:6313947_T/C	14.338	0.0017739	0.000123925	MISS02	missense_variant
1:6504535_C/G	5.19411	0.0022957	0.000442802	PASS	splice_region_variant
1:6504599_C/G	7.97787	0.0013774	0.000119994	PASS	missense_variant
1:6508725_G/A	4.29367	0.0050787	0.00118746	PASS	missense_variant
1:6511815_G/A	6.39639	0.0018877	0.00029559	MISS02	splice_region_variant
1:6522125_T/C	32.8544	0.0034499	0.000105358	PASS	missense_variant
1:6529654_C/T	16.6963	0.0027548	0.000165423	PASS	missense_variant
1:6535149_A/G	20.777	0.0071166	0.000344859	PASS	missense_variant
1:6556628_G/A	16.7876	0.0027555	0.000164566	MISS05	splice_region_variant
1:6609659_G/A	5.32944	0.0032154	0.00041984	PASS	missense_variant
1:6615539_G/A	8.87507	0.0041301	0.000467071	MISS02	missense_variant
1:6637095_T/A	14.3388	0.0032169	0.000225023	PASS	missense_variant
1:6639187_AG/A	5.36102	0.0034451	0.000644426	PASS	frameshift_variant
1:6647697_G/A	3.31335	0.032533	0.010047	PASS	splice_region_variant
1:6741027_T/A	13.2375	0.021579	0.00166332	PASS	missense_variant
1:7798367_C/T	3.51107	0.0066605	0.0012953	PASS	missense_variant
1:7806141_G/A	9.16678	0.0013793	0.000150652	PASS	missense_variant
1:7858622_C/G	20.1141	0.0039062	0.000194926	PASS	missense_variant
1:7879487_G/T	18.0474	0.016797	0.000945719	PASS	splice_region_variant
1:7880231_A/C	13.2014	0.0068871	0.000525037	PASS	missense_variant
1:7887328_C/T	22.4648	0.0020718	9.24e-05	PASS	missense_variant
1:7887454_A/G	10.9547	0.0011484	0.000104941	PASS	missense_variant
1:7890153_C/T	3.36752	0.0071792	0.00214271	PASS	missense_variant
1:7890188_G/A	8.11339	0.0025498	0.000314975	PASS	missense_variant
1:7907929_G/A	15.3687	0.0011526	7.51e-05	MISS02	missense_variant
1:7998823_C/T	3.06697	0.014476	0.00476647	PASS	missense_variant
1:8386016_C/T	15.179	0.0036748	0.000242932	PASS	missense_variant
1:8390781_G/A	12.842	0.0055172	0.000431819	PASS	missense_variant
1:8482797_T/C	3.13231	0.0061983	0.0016334	PASS	missense_variant
1:8927268_C/T	18.8643	0.014233	0.000764801	PASS	missense_variant
1:9305309_A/G	8.12832	0.0041322	0.000510219	PASS	missense_variant
1:9305532_A/G	3.03973	0.0022999	0.000757782	PASS	missense_variant
1:9323877_C/G	8.19352	0.0016077	0.000196493	PASS	missense_variant
1:9324438_C/T	16.6688	0.0018374	0.000110421	PASS	missense_variant
1:9324485_C/T	15.4755	0.021458	0.00141498	PASS	missense_variant
1:9324719_T/C	5.79704	0.007678	0.000591197	MISS02	missense_variant
1:9794165_C/T	20.4753	0.0018399	9e-05	PASS	missense_variant
1:9795966_C/T	7.94818	0.0032154	0.000405686	PASS	missense_variant
1:9796029_C/A	13.3336	0.0073462	0.000554723	PASS	missense_variant
1:9804590_T/C	8.50571	0.0022957	0.000270449	PASS	missense_variant
1:9992024_C/G	3.17768	0.0062126	0.00196343	PASS	missense_variant
1:10166467_C/T	3.96635	0.0016196	0.000240291	PASS	missense_variant
1:10364260_A/G	3.84741	0.031006	0.0082482	PASS	missense_variant
1:10364462_A/C	28.8947	0.003461	0.000120181	PASS	missense_variant
1:10397496_C/A	25.5923	0.0022957	8.99e-05	PASS	missense_variant
1:10434394_G/A	8.13604	0.0039045	0.000481551	PASS	missense_variant
1:10473275_G/A	15.4279	0.0073563	0.00048012	PASS	missense_variant
1:10502454_G/A	3.66634	0.0066225	0.00129257	PASS	missense_variant
1:10523638_GTTCC/G	13.2563	0.0057471	0.000435854	VQSRTrancheINDEL95.00to96.00EXAC	frameshift_variant
1:10523643_T/G	13.2638	0.0057524	0.000436012	VQSRTrancheSNP99.60to99.80	missense_variant
1:10535067_G/A	8.59117	0.022406	0.0026607	MISS02	splice_region_variant
1:10683091_C/G	16.7709	0.0050645	0.000303427	PASS	missense_variant
1:10689676_G/A	7.03357	0.001378	0.000196149	PASS	missense_variant
1:10689903_T/G	21.9917	0.0027804	0.000126766	MISS02	missense_variant
1:10709466_C/A	5.286	0.0032437	0.000302319	MISS02	missense_variant
1:10709499_G/A	18.4146	0.0080991	0.000443215	MISS02	splice_region_variant
1:10713896_C/T	26.8787	0.0016478	6.14e-05	PASS	missense_variant
1:10713997_G/A	4.85695	0.0092251	0.00142295	PASS	missense_variant
1:10714470_G/A	19.1776	0.0018493	6.04e-05	PASS	splice_region_variant
1:10715762_C/T	4.65325	0.0027574	0.00059386	PASS	missense_variant
1:10725278_T/C	21.3712	0.022873	0.00109413	MISS02	missense_variant
1:11073982_T/C	10.1682	0.061723	0.00642793	PASS	missense_variant
1:11087533_A/C	92.0503	0.0013774	1.5e-05	PASS	missense_variant
1:11090814_C/T	15.0113	0.011529	0.000776374	MISS02	missense_variant
1:11106642_G/A	13.0725	0.011489	0.00088829	PASS	missense_variant
1:11114997_C/T	9.02831	0.014259	0.00159965	MISS02	missense_variant
1:11115002_C/T	10.6885	0.013588	0.00128712	MISS02	missense_variant
1:11118844_C/T	5.2736	0.0026673	0.000506879	MISS02	missense_variant
1:11129649_C/T	14.3701	0.0027548	0.000134888	PASS	missense_variant
1:11140823_G/A	3.90324	0.076517	0.0207865	PASS	splice_region_variant
1:11158209_G/A	19.3982	0.010848	0.000565041	MISS02	missense_variant
1:11169789_A/G	3.20635	0.0020671	0.000645607	PASS	splice_region_variant
1:11252324_T/C	3.1931	0.014963	0.00473471	PASS	splice_region_variant
1:11254722_A/G	3.75484	0.0025287	0.000674703	PASS	splice_region_variant
1:11301725_T/C	15.3187	0.0013799	9.02e-05	PASS	missense_variant
1:11333818_G/A	12.7759	0.0011478	8.99e-05	PASS	missense_variant
1:11561057_C/T	12.356	0.0082873	0.000675858	PASS	missense_variant
1:11576195_T/C	20.4624	0.0018425	9.02e-05	PASS	missense_variant
1:11710616_C/T	3.03308	0.0012538	0.000413723	PASS	missense_variant
1:11718390_G/A	10.5203	0.011547	0.00110918	PASS	missense_variant
1:11766494_G/A	7.64037	0.0021048	0.000254833	MISS02	missense_variant
1:11775271_T/A	5.8026	0.026231	0.00462088	PASS	splice_region_variant
1:11807609_C/G	3.7081	0.002068	0.000558541	PASS	splice_region_variant
1:11856405_T/C	13.4211	0.001607	0.000119915	PASS	missense_variant
1:11893701_T/C	15.3779	0.0027624	0.000180099	PASS	splice_region_variant
1:11893969_G/T	16.0602	0.0055198	0.000329736	PASS	missense_variant
1:11982643_C/A	9.16592	0.001992	0.000217713	MISS02	missense_variant
1:11983436_G/C	13.7359	0.0039027	0.000285157	PASS	missense_variant
1:11983496_C/T	9.60242	0.0041322	0.000404931	PASS	missense_variant
1:11985508_C/G	9.90922	0.00199	0.000201183	MISS02	missense_variant
1:12023663_A/G	6.37745	0.0036214	0.000569584	MISS02	missense_variant
1:12024350_C/T	14.208	0.0029968	0.000211512	MISS05	missense_variant
1:12025561_C/T	5.039	0.001607	0.000319324	PASS	missense_variant
1:12061483_G/C	5.69952	0.0018391	0.000323166	PASS	missense_variant
1:12067224_C/T	13.3857	0.001607	0.000120232	PASS	missense_variant
1:12089137_T/C	7.97689	0.0020671	0.000211021	PASS	missense_variant
1:12089823_C/T	11.703	0.0016226	0.000138855	MISS05	splice_region_variant
1:12169689_C/T	3.70777	0.0016085	0.00016726	PASS	missense_variant
1:12175684_G/A	19.212	0.0034435	0.000179824	PASS	missense_variant
1:12251902_G/T	10.2948	0.0048365	0.000471861	MISS02	missense_variant
1:12253143_G/A	11.2752	0.0023084	0.000205163	PASS	missense_variant
1:12262025_C/G	3.41942	0.0044351	0.000524009	MISS02	missense_variant
1:12313827_A/G	3.69429	0.013321	0.00364121	PASS	missense_variant
1:12321021_A/T	14.7329	0.022289	0.00154497	PASS	missense_variant
1:12364649_T/G	4.99635	0.0034467	0.00069175	PASS	missense_variant
1:12364656_G/A	9.09179	0.0066605	0.000736953	PASS	missense_variant
1:12383802_T/C	13.6719	0.0036748	0.000269703	PASS	missense_variant
1:12389963_C/T	18.6165	0.0016077	6e-05	PASS	missense_variant
1:12403017_G/A	19.1934	0.0022967	0.000119922	PASS	missense_variant
1:12429585_A/G	13.9642	0.016077	0.00116875	PASS	missense_variant
1:12640562_C/T	4.42449	0.0011478	0.000165165	PASS	missense_variant
1:12711225_C/A	13.3034	0.0011478	4.5e-05	PASS	missense_variant
1:12726036_C/G	4.54601	0.01682	0.00374914	PASS	missense_variant
1:12779678_G/A	14.6354	0.011505	0.000794627	PASS	missense_variant
1:12779681_A/G	15.3627	0.0016099	0.000104951	PASS	missense_variant
1:12815677_C/T	11.8726	0.0039027	0.000329894	PASS	stop_gained
1:12820821_G/A	16.2322	0.0043618	0.000269817	PASS	missense_variant
1:12837153_G/A	5.82478	0.0011837	4.6e-05	PASS	splice_acceptor_variant
1:12837210_C/T	14.1618	0.001385	9.02e-05	VQSRTrancheSNP99.60to99.80EXAC	missense_variant
1:12837233_T/C	7.71219	0.0011563	0.000150083	VQSRTrancheSNP99.60to99.80EXAC	missense_variant
1:12837239_A/G	15.8313	0.022089	0.00142476	PASS	missense_variant
1:12854569_A/G	3.91138	0.001151	0.000285482	MISS02	missense_variant
1:12854648_A/G	5.34227	0.0013882	0.000256395	MISS02	splice_region_variant
1:12887304_T/C	9.66996	0.0013774	0.000142617	MISS05	missense_variant
1:12887579_G/T	6.34834	0.0027599	0.000435757	MISS02	missense_variant
1:12887606_C/G	8.45052	0.0095305	0.00103351	MISS02	missense_variant
1:12887612_T/C	3.70662	0.011023	0.00194516	MISS02	missense_variant
1:12907469_C/G	3.27475	0.0032154	0.000435933	MISS02	missense_variant
1:12921095_G/A	3.17036	0.0041398	0.00130949	MISS05	missense_variant
1:12939733_G/A	4.52337	0.0042908	0.000951766	MISS05	missense_variant
1:12941819_A/G	14.2723	0.0039062	0.00027469	MISS05	missense_variant
1:12942916_A/G	3.03513	0.0032214	0.00106367	MISS05	splice_region_variant
1:13001258_C/T	22.5798	0.0013806	6.12e-05	MISS05	missense_variant
1:14105605_A/G	15.4707	0.014699	0.000963362	PASS	missense_variant
1:14107037_G/A	15.2807	0.0018365	0.000120391	PASS	missense_variant
1:14107195_G/T	17.9844	0.022793	0.00129526	MISS05	missense_variant
1:14108975_C/T	11.9922	0.0089532	0.000752763	PASS	missense_variant
1:14109125_A/C	11.4718	0.002068	0.000180609	PASS	missense_variant
1:15370555_G/A	12.9909	0.011494	0.000894261	PASS	missense_variant
1:15370558_G/A	12.6568	0.0025299	0.000200351	PASS	missense_variant
1:15545834_AGAG/A	10.9773	0.001533	0.000139847	MISS02	inframe_deletion
1:15772126_A/C	9.07143	0.0052849	0.000585339	PASS	missense_variant
1:15794032_C/T	13.9698	0.0023073	0.000165518	PASS	missense_variant
1:15808771_T/C	11.683	0.0043638	0.000375015	PASS	missense_variant
1:15894352_G/T	15.3584	0.0022967	0.000149862	PASS	missense_variant
1:15905482_T/G	3.15883	0.0013774	0.000436458	PASS	missense_variant
1:15978327_C/T	14.1768	0.0027561	0.000194908	PASS	missense_variant
1:15987709_T/A	18.4414	0.016077	0.000885248	PASS	missense_variant
1:16053832_A/G	12.4358	0.012952	0.00105407	MISS02	missense_variant
1:16053985_G/A	10.3405	0.0080556	0.000784745	MISS02	missense_variant
1:16057120_C/A	10.0616	0.0016417	0.000163406	MISS02	missense_variant
1:16063137_T/C	19.1978	0.0025088	0.000130993	PASS	missense_variant
1:16064421_T/C	10.8475	0.0011478	0.000105923	PASS	splice_region_variant
1:16065747_G/A	17.2068	0.0057551	0.000336289	PASS	missense_variant
1:16069116_C/T	13.6174	0.0025451	0.000187342	PASS	missense_variant
1:16069525_C/T	3.52353	0.033534	0.00975136	MISS02	missense_variant
1:16073454_C/T	13.0643	0.0029844	0.000229071	PASS	missense_variant
1:16091591_G/A	4.92317	0.012885	0.00264437	PASS	missense_variant
1:16202710_A/G	12.7796	0.0011521	9.02e-05	PASS	missense_variant
1:16202894_A/G	8.95847	0.0016085	0.000179808	PASS	missense_variant
1:16203091_A/G	6.37688	0.0027561	0.000433209	PASS	missense_variant
1:16257729_C/T	13.1499	0.001378	0.000104926	PASS	missense_variant
1:16259151_G/C	11.4477	0.0053167	0.000466699	PASS	missense_variant
1:16271590_G/C	15.3505	0.0016264	0.000106112	MISS02	missense_variant
1:16272819_T/C	8.73814	0.0044939	0.000516341	PASS	splice_region_variant
1:16372124_G/T	6.06698	0.0043678	0.000722565	PASS	missense_variant
1:16376332_A/G	20.494	0.017218	0.000854137	PASS	missense_variant
1:16380180_A/C	19.3669	0.0066636	0.000181099	PASS	missense_variant
1:16380228_T/C	8.88611	0.0016077	0.000181181	VQSRTrancheSNP99.60to99.80	missense_variant
1:16382003_G/A	14.6391	0.0039152	0.000268427	PASS	stop_gained
1:16382218_AC/A	11.3961	0.0013774	0.000121018	PASS	frameshift_variant
1:16382989_G/C	16.8856	0.0025276	0.000150047	PASS	missense_variant
1:16460997_C/G	10.8355	0.0022967	0.000212404	MISS02	missense_variant
1:16475181_G/A	15.2987	0.0018374	0.000120308	PASS	missense_variant
1:16475362_C/T	17.5287	0.0018374	0.000105004	PASS	missense_variant
1:16531579_C/T	8.43942	0.028329	0.00344272	MISS02	splice_region_variant
1:16736098_C/T	29.044	0.0011612	4e-05	MISS02	splice_region_variant
1:16891299_T/C	7.85234	0.127	0.0181894	MISS02	splice_region_variant
1:16894473_C/T	8.69012	0.0067099	0.000755572	MISS05	splice_donor_variant
1:16894523_G/A	44.7432	0.0020833	4.67e-05	MISS02	missense_variant
1:16903822_C/A	4.02224	0.0029913	0.000745365	VQSRTrancheSNP99.60to99.80EXAC	stop_gained
1:16909144_G/A	4.30051	0.0020975	0.000113118	MISS02	missense_variant
1:16918454_G/A	12.4407	0.003214	0.000149844	MISS05	missense_variant
1:17086007_A/C	901.046	0.17793	3.35e-05	VQSRTrancheSNP99.80to99.90EXAC	splice_region_variant
1:17257838_G/A	6.56606	0.0013774	0.000210021	PASS	missense_variant
1:17257843_G/A	15.3226	0.0013774	9e-05	PASS	missense_variant
1:17264240_G/T	12.0626	0.013976	0.00117366	MISS05	splice_region_variant
1:17292323_C/T	17.4466	0.0032154	0.00018486	PASS	missense_variant
1:17295841_G/A	3.69267	0.0019666	0.000317907	MISS02	splice_region_variant
1:17313049_G/A	21.8727	0.01011	0.000466723	PASS	missense_variant
1:17313566_AG/A	8.58566	0.0018365	0.000214251	PASS	frameshift_variant
1:17316749_C/T	18.8286	0.0011489	6.11e-05	PASS	missense_variant
1:17320162_C/T	6.11277	0.0044643	0.000733061	MISS02	missense_variant
1:17326989_G/A	7.84096	0.0071199	0.000913715	PASS	missense_variant
1:17371298_C/T	12.9933	0.010795	0.000839178	PASS	missense_variant
1:17371377_G/C	18.1497	0.0013787	7.61e-05	PASS	missense_variant
1:17395682_G/A	17.2706	0.01034	0.000524675	PASS	missense_variant
1:17405814_C/T	3.66349	0.0068902	0.00189025	PASS	missense_variant
1:17409113_T/TG	4.48198	0.0011633	0.000212147	PASS	frameshift_variant
1:17418980_C/T	18.661	0.0016107	6.01e-05	MISS02	missense_variant
1:17420121_C/T	6.601	0.0068871	0.00104948	PASS	missense_variant
1:17431434_G/A	11.1464	0.0032199	0.000289722	MISS02	missense_variant
1:17552348_C/A	25.579	0.0011489	4.5e-05	PASS	missense_variant
1:17555266_CT/C	15.3789	0.002301	0.000149943	PASS	missense_variant
1:17555507_C/T	9.9199	0.0040568	0.000410453	MISS02	missense_variant
1:17575682_C/T	23.6773	0.0045935	0.000194862	PASS	missense_variant
1:17599902_G/T	17.092	0.0020661	0.000121117	PASS	missense_variant
1:17603078_C/A	15.4041	0.0052825	0.000344631	PASS	missense_variant
1:17664616_G/A	20.5458	0.0055122	0.000269703	PASS	missense_variant
1:17666222_C/A	3.17935	0.010565	0.00334724	PASS	missense_variant
1:17685826_G/A	15.3359	0.0018365	0.000119958	PASS	missense_variant
1:17690206_C/A	3.20417	0.0043678	0.00136727	PASS	missense_variant
1:17942591_G/A	11.4296	0.0041379	0.000363405	PASS	start_lost
1:18152646_C/T	17.1225	0.004136	0.000242498	PASS	missense_variant
1:18691991_G/A	13.0611	0.0064279	0.000495079	PASS	missense_variant
1:18702881_G/A	14.2734	0.0029858	0.000209769	PASS	missense_variant
1:18807813_C/G	6.0142	0.0034574	0.000576535	MISS02	missense_variant
1:18807968_C/T	10.1492	0.0059715	0.000591554	PASS	missense_variant
1:18808843_G/C	88.969	0.0013774	1.55e-05	PASS	missense_variant
1:18809310_G/A	8.50758	0.0018605	0.000219047	MISS02	stop_gained
1:19166157_G/A	7.97331	0.0068902	0.000586307	PASS	missense_variant
1:19175895_G/T	11.9559	0.0011484	7.49e-05	PASS	stop_gained
1:19175932_C/T	14.4459	0.017463	0.00122883	PASS	missense_variant
1:19180894_T/C	15.0787	0.0020699	0.000137539	PASS	missense_variant
1:19181279_G/A	4.89543	0.0046319	0.000949668	MISS02	missense_variant
1:19181438_G/C	8.14015	0.0018433	0.000226812	PASS	missense_variant
1:19203974_T/C	7.52449	0.010486	0.00140637	MISS02	missense_variant
1:19209686_C/T	10.5862	0.0011478	0.000108537	PASS	missense_variant
1:19211999_C/T	11.3854	0.0054645	0.000482359	MISS02	missense_variant
1:19401382_A/T	15.1095	0.001378	9.13e-05	PASS	missense_variant
1:19408014_G/A	13.2965	0.0098714	0.000749243	PASS	missense_variant
1:19423058_C/T	19.7274	0.0020661	0.000104938	PASS	missense_variant
1:19440554_T/C	10.9624	0.0022978	0.000210046	PASS	missense_variant
1:19443890_T/C	13.2783	0.018391	0.001409	PASS	missense_variant
1:19468246_A/C	6.65693	0.0011494	0.000165205	PASS	missense_variant
1:19477224_G/C	8.33661	0.0013774	0.000165423	PASS	missense_variant
1:19487449_G/A	7.15341	0.001378	4.51e-05	PASS	missense_variant
1:19493697_C/T	24.5766	0.0036731	0.000149984	PASS	missense_variant
1:19499499_G/A	3.984	0.0011478	5.99e-05	PASS	missense_variant
1:19504194_G/A	16.8148	0.0055198	0.000329984	PASS	missense_variant
1:19504227_T/C	11.3333	0.011316	0.00100888	PASS	missense_variant
1:19510507_G/A	13.7044	0.0018459	0.000134924	PASS	splice_region_variant
1:19510621_G/C	19.1357	0.0011478	6e-05	PASS	missense_variant
1:19518991_C/T	25.5124	0.0011478	4.5e-05	PASS	missense_variant
1:19519994_C/T	7.6621	0.0011478	0.000149952	PASS	missense_variant
1:19559516_T/G	43.9919	0.0045935	0.000104888	PASS	missense_variant
1:19584997_G/A	4.65537	0.0052801	0.00113892	PASS	missense_variant
1:19644220_G/A	7.9907	0.0020671	0.000134924	PASS	missense_variant
1:20005689_C/T	3.74674	0.0042605	0.000922698	PASS	missense_variant
1:20067419_G/A	27.7143	0.0025931	9.38e-05	MISS02	missense_variant
1:20141036_C/T	8.35054	0.001607	0.000119994	PASS	missense_variant
1:20141296_C/T	5.83446	0.0011515	0.000106542	PASS	missense_variant
1:20141465_G/A	18.2025	0.0039045	0.000215298	PASS	missense_variant
1:20141556_G/C	11.3555	0.0050691	0.000448472	PASS	missense_variant
1:20224085_A/G	14.8299	0.0059688	0.000404737	PASS	missense_variant
1:20234222_G/A	15.0668	0.01011	0.000677405	PASS	missense_variant
1:20466718_A/G	4.66962	0.0016129	3e-05	PASS	splice_region_variant
1:20517316_C/T	21.1607	0.0057392	0.000272711	PASS	missense_variant
1:20517491_G/A	21.3911	0.001607	7.52e-05	PASS	missense_variant
1:20940329_C/T	4.71105	0.0084979	0.000749535	PASS	splice_region_variant
1:20964567_G/A	4.76465	0.0020718	0.000106006	PASS	missense_variant
1:20975724_G/A	12.1543	0.0018374	0.000151428	MISS05	splice_region_variant
1:20980169_C/T	14.4359	0.0036782	0.00025567	PASS	missense_variant
1:20987879_A/C	5.36626	0.002148	0.000400979	MISS02	missense_variant
1:20998548_G/A	11.9266	0.014699	0.00109396	PASS	missense_variant
1:21009279_C/T	4.80649	0.006204	0.000870061	PASS	missense_variant
1:21014143_G/A	5.08415	0.0013787	0.000271477	PASS	missense_variant
1:21031159_C/T	19.5995	0.0064338	0.000330281	PASS	missense_variant
1:21042129_C/T	9.14421	0.0013774	0.000150816	PASS	missense_variant
1:21050719_C/T	4.10382	0.0080571	0.00197535	PASS	missense_variant
1:21050981_G/A	11.2462	0.0020718	9.78e-05	MISS02	missense_variant
1:21167434_T/G	27.6317	0.0020661	7.49e-05	PASS	missense_variant
1:21226379_T/A	9.57808	0.0034435	0.000360631	PASS	start_lost
1:21605750_A/C	12.0614	0.0050551	0.000421065	PASS	missense_variant
1:21798183_G/C	13.1579	0.01977	0.00153047	MISS05	missense_variant
1:21798276_G/C	12.0759	0.0034435	0.000286058	MISS05	missense_variant
1:21799979_G/A	8.95037	0.001607	0.000179802	PASS	missense_variant
1:21806568_G/C	12.307	0.0035112	0.000286224	MISS05	missense_variant
1:21889718_G/A	16.4878	0.0062155	0.00037919	PASS	missense_variant
1:21896823_C/T	18.895	0.038621	0.00212158	PASS	missense_variant
1:22074740_G/A	12.0779	0.001151	9.54e-05	PASS	missense_variant
1:22142456_C/T	19.5124	0.003214	0.00016522	PASS	missense_variant
1:22149892_G/A	3.44127	0.0018597	0.000222866	PASS	stop_gained
1:22156041_C/T	5.78421	0.0066882	0.00116272	PASS	missense_variant
1:22157498_G/C	7.50394	0.0012525	0.000167094	MISS02	missense_variant
1:22157788_C/T	5.31817	0.0018365	0.000240862	PASS	missense_variant
1:22159784_G/A	4.38907	0.0036765	0.000840034	PASS	missense_variant
1:22161367_C/T	4.16179	0.0016077	0.000240717	PASS	missense_variant
1:22161492_C/T	3.46494	0.004136	0.0011972	MISS02	missense_variant
1:22162121_G/A	13.8805	0.0078089	0.000566685	PASS	missense_variant
1:22165864_T/C	7.98131	0.0020661	0.000165638	PASS	missense_variant
1:22166460_C/G	3.62501	0.0039027	0.00107965	PASS	missense_variant
1:22169837_G/A	5.29421	0.0013774	6.05e-05	PASS	missense_variant
1:22170652_C/G	6.5736	0.0050505	0.000332116	PASS	missense_variant
1:22170681_G/A	15.857	0.0064338	0.0004082	PASS	missense_variant
1:22170703_C/T	7.39133	0.0041322	0.000561065	PASS	missense_variant
1:22174498_C/T	10.9578	0.0052825	0.000332658	PASS	missense_variant
1:22175267_C/T	11.9346	0.0016107	0.000135159	PASS	missense_variant
1:22179462_C/T	7.13233	0.0050528	0.000476556	PASS	missense_variant
1:22180779_C/T	3.08151	0.0048051	0.00156441	PASS	missense_variant
1:22186161_G/A	6.51339	0.0033333	0.00051321	MISS02	missense_variant
1:22198765_C/T	6.70771	0.005611	0.000840513	PASS	missense_variant
1:22199438_G/C	9.6079	0.0048298	0.000504875	PASS	missense_variant
1:22199521_T/C	17.0118	0.0018365	0.000108142	PASS	missense_variant
1:22201162_A/G	10.8397	0.0016219	0.000149846	MISS02	missense_variant
1:22203084_C/T	7.62923	0.0011478	0.000150598	PASS	missense_variant
1:22204673_G/A	12.2231	0.0071429	0.000588235	PASS	splice_region_variant
1:22205598_G/A	16.7035	0.0016077	7.5e-05	PASS	missense_variant
1:22211356_C/G	8.41142	0.0011478	0.000136595	PASS	missense_variant
1:22216580_C/T	16.7477	0.001607	8.99e-05	PASS	missense_variant
1:22307572_G/T	6.33391	0.0048209	0.000764228	PASS	missense_variant
1:22446798_A/T	9.30692	0.0045914	0.000495362	PASS	missense_variant
1:22838556_C/T	6.99238	0.0025276	0.000362264	PASS	missense_variant
1:22850753_G/A	5.02563	0.0039045	0.000164873	PASS	missense_variant
1:22852757_G/C	27.6705	0.002069	7.49e-05	PASS	missense_variant
1:22915508_G/A	5.6826	0.0020862	0.000367753	MISS02	missense_variant
1:22920141_G/A	12.5656	0.0055262	0.000442038	MISS02	missense_variant
1:22927568_G/T	27.7379	0.011445	0.000417215	PASS	missense_variant
1:22927801_C/T	27.9478	0.0026532	9.52e-05	MISS02	missense_variant
1:22928191_G/A	4.7828	0.0029491	0.000618047	PASS	missense_variant
1:22928194_C/T	7.40653	0.0075758	0.0010296	PASS	missense_variant
1:22985980_C/T	24.1118	0.0025276	0.000105083	PASS	missense_variant
1:23191508_G/A	17.7301	0.042963	0.00252556	PASS	missense_variant
1:23408073_A/G	8.11497	0.0018365	0.000226675	PASS	splice_region_variant
1:23417739_G/A	15.7716	0.0027612	0.000175528	PASS	missense_variant
1:23418128_C/T	6.8426	0.0036799	0.000539487	PASS	missense_variant
1:23418504_G/A	15.3735	0.0018399	0.000119886	PASS	missense_variant
1:23419932_A/G	15.341	0.001607	0.00010491	PASS	missense_variant
1:23520259_C/A	6.6032	0.0048387	0.000735802	PASS	missense_variant
1:23520399_T/C	10.2445	0.0027561	0.000269703	PASS	missense_variant
1:23520526_T/C	21.7967	0.0039045	0.000179802	PASS	missense_variant
1:23688491_T/TA	19.6093	0.0041628	0.000213129	PASS	frameshift_variant
1:23688497_C/T	38.1825	0.0011569	3.03e-05	PASS	missense_variant
1:23751111_C/T	22.1458	0.0050505	0.000229162	PASS	missense_variant
1:23759654_C/T	4.03756	0.0022967	0.000569818	PASS	missense_variant
1:23759743_G/T	4.05978	0.027687	0.00696517	MISS02	missense_variant
1:23762428_A/C	16.7088	0.016766	0.00101949	PASS	missense_variant
1:23836551_G/A	18.9368	0.0028156	0.000149081	MISS02	missense_variant
1:24077621_C/A	11.4147	0.0013774	0.00012082	PASS	missense_variant
1:24077957_A/G	3.14007	0.015381	0.0049502	PASS	missense_variant
1:24082352_A/G	9.04721	0.0023105	0.000255908	PASS	missense_variant
1:24119139_G/A	8.18091	0.0011569	0.000141558	PASS	splice_region_variant
1:24119233_G/C	15.0172	0.0075932	0.000509244	PASS	missense_variant
1:24175224_C/T	9.20615	0.001378	0.000149867	PASS	missense_variant
1:24201269_G/A	12.1215	0.013103	0.00109413	PASS	missense_variant
1:24201711_G/T	3.56852	0.018433	0.00523489	PASS	missense_variant
1:24384092_G/A	53.7284	0.0016099	3e-05	PASS	missense_variant
1:24390025_C/T	4.78133	0.0020661	9.01e-05	PASS	splice_region_variant
1:24394452_G/A	10.3692	0.0071199	0.000584638	PASS	splice_region_variant
1:24394770_C/T	10.6832	0.0055096	0.000329756	PASS	missense_variant
1:24394835_C/G	3.84631	0.0036799	0.000959348	PASS	missense_variant
1:24434562_C/T	14.7531	0.029751	0.00207412	PASS	missense_variant
1:24465210_G/C	10.573	0.0020795	0.000197051	PASS	splice_region_variant
1:24977901_C/T	7.44468	0.0013819	0.000185845	PASS	missense_variant
1:24977982_C/T	12.8134	0.0034499	0.0002701	PASS	missense_variant
1:24978981_C/T	4.67199	0.0016309	4.58e-05	MISS05	missense_variant
1:24981585_G/A	3.08168	0.010815	0.00353528	PASS	missense_variant
1:24993386_G/A	5.59252	0.0042273	0.000758518	MISS02	missense_variant
1:25166416_G/T	8.51587	0.0011478	0.00013492	PASS	missense_variant
1:25553993_T/C	15.4203	0.0071166	0.0004646	PASS	missense_variant
1:25573262_G/C	9.59355	0.0041398	0.000215823	PASS	missense_variant
1:25889630_C/G	19.6208	0.0020747	0.000105948	PASS	missense_variant
1:26138236_GGCA/G	8.27021	0.0014786	0.000179019	MISS02	inframe_deletion
1:26310567_G/A	6.79969	0.0043678	0.000644755	PASS	missense_variant
1:26314810_G/A	18.9041	0.0075932	0.000404579	PASS	missense_variant
1:26317303_C/T	3.5935	0.0027574	0.00076886	PASS	missense_variant
1:26317305_CA/C	14.2549	0.0032169	0.000226347	PASS	frameshift_variant
1:26349759_C/T	15.0365	0.0023474	0.000156456	MISS02	stop_gained
1:26371500_C/T	11.9566	0.0011478	4.5e-05	PASS	missense_variant
1:26384973_G/A	9.57313	0.0071264	0.000749198	PASS	stop_gained
1:26448452_A/G	15.3579	0.0025253	0.000164819	PASS	missense_variant
1:26507327_T/A	10.7395	0.001607	0.000149853	PASS	missense_variant
1:26508416_G/A	4.42475	0.0052825	0.00119875	PASS	missense_variant
1:26508429_T/G	4.18756	0.0016077	0.000179829	MISS05	missense_variant
1:26515264_C/T	6.70596	0.010228	0.0015386	PASS	splice_region_variant
1:26515965_C/T	6.72857	0.0016114	0.000239815	PASS	missense_variant
1:26517811_A/G	3.37423	0.030401	0.00920669	PASS	missense_variant
1:26581916_A/G	13.9284	0.010335	0.000749198	PASS	missense_variant
1:26601519_G/A	7.05082	0.008008	0.00114361	MISS02	missense_variant
1:26607362_C/T	14.2803	0.0064368	0.00045346	PASS	missense_variant
1:26628180_C/T	6.16728	0.0080571	0.00131531	PASS	splice_region_variant
1:26655304_C/G	14.6937	0.015409	0.00106396	PASS	missense_variant
1:26658089_G/A	6.38142	0.0027561	0.000270189	PASS	missense_variant
1:26664907_A/C	19.7148	0.0073631	0.00037611	PASS	missense_variant
1:26688381_G/A	5.32362	0.0013793	0.00012012	PASS	missense_variant
1:26688464_C/T	16.0256	0.0062155	0.000390121	PASS	missense_variant
1:26691683_G/A	5.01644	0.016809	0.00267521	MISS02	missense_variant
1:26694137_G/A	7.1841	0.0011553	0.000160974	MISS02	missense_variant
1:26764719_A/G	24.2143	0.0050551	0.000209782	PASS	missense_variant
1:26795528_C/T	13.0765	0.0096507	0.000744658	PASS	missense_variant
1:26881173_G/A	7.23207	0.0036799	0.000510449	PASS	missense_variant
1:27089742_G/A	21.4253	0.0062645	0.000294145	PASS	missense_variant
1:27100142_A/G	17.5396	0.0018365	0.000104888	PASS	missense_variant
1:27124222_C/T	8.00036	0.010335	0.0013036	PASS	missense_variant
1:27159080_G/A	4.65444	0.0016085	0.000120693	PASS	missense_variant
1:27210667_C/T	10.006	0.011055	0.00111594	PASS	missense_variant
1:27217595_C/T	20.4173	0.0018374	9.01e-05	PASS	missense_variant
1:27268056_A/G	41.2054	0.0014012	3.41e-05	MISS02	missense_variant
1:27268299_C/T	7.89542	0.0020671	0.0001358	PASS	missense_variant
1:27269429_G/A	5.06919	0.0082721	0.000540622	PASS	missense_variant
1:27278303_T/C	8.8973	0.0034467	0.000211098	PASS	missense_variant
1:27332983_T/C	4.23257	0.0011505	0.000272059	PASS	missense_variant
1:27428886_CGGT/C	10.869	0.015459	0.00144255	MISS05	inframe_deletion
1:27632690_C/G	5.12794	0.0059743	0.00117068	PASS	missense_variant
1:27660768_G/A	7.39656	0.0099078	0.000886152	PASS	missense_variant
1:27676194_G/A	4.05789	0.0020824	0.000175329	MISS02	missense_variant
1:27685195_C/A	7.58885	0.0018374	0.000242505	PASS	splice_region_variant
1:27690466_A/C	20.3264	0.002302	0.0001135	MISS02	missense_variant
1:27690482_G/A	11.7476	0.0050761	0.000434112	MISS02	missense_variant
1:27690783_C/T	19.7596	0.0029844	0.000151465	PASS	missense_variant
1:27695848_C/G	12.3014	0.0036748	0.000299742	PASS	missense_variant
1:27708996_C/T	11.4195	0.0080113	0.000706714	PASS	missense_variant
1:27744825_C/G	3.43795	0.017503	0.0051551	PASS	stop_gained
1:27874243_T/G	12.1833	0.015849	0.00132009	MISS02	missense_variant
1:27875286_T/C	14.8325	0.002069	0.00013976	PASS	missense_variant
1:27875800_T/G	3.65905	0.0038023	0.000600887	PASS	missense_variant
1:27876545_G/T	17.6532	0.0014184	8.05e-05	MISS02	missense_variant
1:27939789_A/C	32.7725	0.0034435	0.000105425	PASS	missense_variant
1:28099909_G/A	14.4182	0.0016099	0.000111825	MISS02	missense_variant
1:28176777_G/A	5.42638	0.0055147	0.00102087	PASS	missense_variant
1:28206533_G/A	4.05039	0.0054016	0.000503699	PASS	missense_variant
1:28209218_C/G	25.5782	0.0011489	4.5e-05	PASS	missense_variant
1:28211893_A/G	13.2531	0.0057392	0.000435357	PASS	missense_variant
1:28211937_C/T	4.62613	0.0016107	0.000136186	PASS	missense_variant
1:28212428_A/G	4.94896	0.0050528	0.00102512	PASS	missense_variant
1:28223590_C/T	19.495	0.0043638	0.000224773	PASS	missense_variant
1:28275530_G/A	7.53048	0.0016204	0.000215482	PASS	missense_variant
1:28279851_A/G	20.428	0.0018399	9.02e-05	PASS	missense_variant
1:28282259_G/A	5.72221	0.013321	0.00235382	PASS	missense_variant
1:28285139_G/C	15.1157	0.0039098	0.000241699	PASS	missense_variant
1:28293641_G/A	15.7819	0.013095	0.000840054	MISS02	missense_variant
1:28477171_C/T	26.1683	0.0039062	0.000149835	PASS	missense_variant
1:28564481_G/T	18.2387	0.0041475	0.000228297	MISS05	missense_variant
1:28599108_G/C	9.45065	0.0018408	0.000195101	PASS	missense_variant
1:28600607_A/G	3.10382	0.001607	0.000194914	PASS	missense_variant
1:28657228_A/G	9.11829	0.0013889	0.000152509	MISS02	missense_variant
1:28657231_G/T	12.9906	0.0011574	4.59e-05	MISS02	stop_gained
1:28792952_C/T	11.1327	0.0082797	0.000749378	PASS	missense_variant
1:28800530_C/T	7.04076	0.0025264	0.000359604	PASS	missense_variant
1:28800629_A/G	7.54083	0.016636	0.00223842	PASS	missense_variant
1:28817531_C/T	26.697	0.0016077	6.03e-05	PASS	splice_region_variant
1:29320034_G/A	19.2346	0.0057392	0.000300012	PASS	missense_variant
1:29338416_C/T	11.9687	0.0048209	0.000404579	PASS	missense_variant
1:29342245_C/T	6.29491	0.061983	0.0103881	PASS	missense_variant
1:29391533_G/C	23.0351	0.0020671	8.99e-05	PASS	missense_variant
1:29475542_G/A	15.3777	0.0039027	0.00025472	PASS	missense_variant
1:29527025_T/TA	24.46	0.0036765	0.000150839	PASS	splice_region_variant
1:29528516_C/T	21.4819	0.001607	7.49e-05	PASS	missense_variant
1:29528531_C/T	3.06062	0.0071199	0.0023375	PASS	missense_variant
1:29631878_G/A	46.0079	0.0013774	3e-05	PASS	missense_variant
1:29644279_C/T	7.88053	0.0064546	0.000823698	PASS	missense_variant
1:31191655_G/T	5.0617	0.0013787	0.000272681	PASS	missense_variant
1:31346102_C/T	9.97812	0.012862	0.00130411	PASS	missense_variant
1:31409571_C/T	24.5597	0.0018382	7.5e-05	PASS	missense_variant
1:31447657_T/C	23.4421	0.001924	8.22e-05	MISS02	splice_region_variant
1:31465377_T/G	16.8342	0.023197	0.0014087	PASS	missense_variant
1:31532110_C/T	12.6858	0.025058	0.00129545	PASS	missense_variant
1:31897557_G/A	7.85862	0.0079137	0.00101401	MISS02	missense_variant
1:32042865_G/A	15.921	0.0076637	0.000484841	MISS02	missense_variant
1:32086543_C/T	10.941	0.0022978	0.000210457	PASS	missense_variant
1:32087170_T/C	12.8985	0.0082683	0.000645956	PASS	missense_variant
1:32089178_C/A	3.94033	0.0059798	0.00152439	PASS	missense_variant
1:32098047_G/A	5.31903	0.001378	0.00025936	PASS	missense_variant
1:32098907_G/A	21.9361	0.0030176	0.000137961	PASS	missense_variant
1:32120944_G/A	8.02357	0.0039243	0.000490782	VQSRTrancheSNP99.60to99.80	missense_variant
1:32120947_TCCCCGAAGG/T	8.01447	0.0039152	0.000490196	PASS	inframe_deletion
1:32121026_C/G	8.89806	0.001607	0.000180859	PASS	missense_variant
1:32138198_C/T	7.2271	0.0012048	0.000166879	PASS	missense_variant
1:32156817_C/A	20.1343	0.0039189	0.000195365	PASS	missense_variant
1:32158076_T/C	3.1944	0.025302	0.00806084	PASS	missense_variant
1:32193634_C/G	5.39043	0.001022	0.000189753	PASS	missense_variant
1:32203083_T/C	5.97542	0.0011478	0.000104982	PASS	missense_variant
1:32204230_C/G	12.0335	0.0013947	0.00011605	PASS	missense_variant
1:32204237_G/A	3.22033	0.0011601	0.000360531	MISS05	splice_region_variant
1:32207729_C/T	16.7372	0.0020699	0.000123912	PASS	missense_variant
1:32542835_C/T	92.0503	0.0013774	1.5e-05	PASS	missense_variant
1:32673445_G/C	10.2273	0.0027599	0.00027053	PASS	missense_variant
1:32800320_C/T	9.37933	0.0025334	0.000270717	PASS	missense_variant
1:32829204_CAG/C	10.8228	0.0027804	0.000257552	PASS	frameshift_variant
1:33059023_C/T	5.75349	0.0013787	0.000239902	PASS	missense_variant
1:33059218_G/A	30.7219	0.0022967	7.49e-05	PASS	missense_variant
1:33059343_A/G	3.66103	0.0051716	0.000473673	MISS02	missense_variant
1:33065688_A/G	14.7089	0.010451	0.000717513	PASS	missense_variant
1:33236375_A/C	19.7555	0.0030488	0.000154775	MISS02	missense_variant
1:33236824_C/T	11.6751	0.029357	0.00258386	PASS	missense_variant
1:33237001_C/T	12.5069	0.0042543	0.000341494	PASS	missense_variant
1:33237449_G/A	11.465	0.0015075	0.000131668	MISS02	missense_variant
1:33237916_C/CTCCA	9.12137	0.0025546	0.000280706	PASS	frameshift_variant
1:33333976_C/T	21.4615	0.0016189	7.55e-05	PASS	missense_variant
1:33361173_C/T	3.40807	0.0025694	0.000397267	MISS02	missense_variant
1:33361266_C/T	5.26182	0.0065872	0.0012586	PASS	missense_variant
1:33613304_G/A	10.5682	0.0011521	0.000109129	PASS	missense_variant
1:33625490_C/T	10.7207	0.013799	0.000795715	MISS05	missense_variant
1:33773009_C/A	12.2945	0.0233	0.00193661	PASS	missense_variant
1:33778190_G/T	57.2566	0.0026596	4.66e-05	PASS	missense_variant
1:33820519_C/T	8.7545	0.0018374	0.000210223	PASS	missense_variant
1:33820748_CGGCTGCTGCTGTTGTGGCTGT/C	11.4382	0.023386	0.00208914	MISS02	inframe_deletion
1:33945011_G/A	5.27357	0.0075758	0.00144543	PASS	missense_variant
1:33954221_G/A	9.60537	0.0011542	0.000120286	PASS	missense_variant
1:33955193_G/A	18.819	0.0062012	0.000331465	PASS	missense_variant
1:33956619_T/C	25.6925	0.0095286	0.000374298	MISS02	splice_region_variant
1:33960715_C/T	12.6313	0.024458	0.00198091	PASS	missense_variant
1:34008403_C/T	16.3074	0.0016077	1.51e-05	PASS	missense_variant
1:34076667_C/T	6.87483	0.011055	0.00162338	PASS	missense_variant
1:34076772_G/A	12.7158	0.0011478	9.04e-05	PASS	missense_variant
1:34076854_G/A	4.95809	0.0011537	0.000232905	PASS	splice_region_variant
1:34164373_C/T	18.003	0.0030093	0.000167632	PASS	missense_variant
1:34191064_C/A	16.4591	0.0034435	0.000209895	PASS	missense_variant
1:34285335_C/T	11.9979	0.0018391	0.000153544	PASS	missense_variant
1:34330289_C/T	12.2562	0.0027637	0.000226067	PASS	missense_variant
1:34666589_C/T	9.35915	0.006993	0.00075188	MISS02	missense_variant
1:34677978_AC/A	11.5781	0.0071429	0.000620986	PASS	frameshift_variant
1:35222995_C/T	3.19248	0.0036765	0.00115453	PASS	missense_variant
1:35223224_G/A	9.01569	0.0039045	0.000434587	PASS	missense_variant
1:35227033_T/G	30.6021	0.0022978	7.53e-05	PASS	missense_variant
1:35227397_C/T	9.2099	0.0071199	0.00042061	PASS	missense_variant
1:35250943_G/A	3.40861	0.001378	0.000404664	PASS	missense_variant
1:35251013_GCCTGCACAAGGA/G	9.75845	0.0025276	0.00024058	VQSRTrancheINDEL97.00to99.00EXAC	inframe_deletion
1:35334472_C/A	20.4314	0.0035461	0.000174149	MISS02	missense_variant
1:35365764_G/A	12.8159	0.024586	0.0019629	PASS	missense_variant
1:35369951_G/A	17.6355	0.0013793	7.83e-05	PASS	missense_variant
1:35370134_C/T	22.1595	0.0029885	0.000135249	PASS	missense_variant
1:35370549_C/T	9.73161	0.0061875	0.000639364	MISS02	missense_variant
1:35454473_C/G	6.59202	0.01999	0.00245819	MISS02	missense_variant
1:35470798_C/T	16.0433	0.0057418	0.000359831	PASS	missense_variant
1:35496159_C/G	3.38436	0.0029913	0.000885726	PASS	missense_variant
1:35824753_A/G	4.80401	0.0027574	0.000575235	PASS	missense_variant
1:35835984_A/G	9.30367	0.0050798	0.000548486	PASS	missense_variant
1:36026509_G/A	11.0085	0.0041379	0.000377302	PASS	missense_variant
1:36053940_C/A	9.44287	0.0018553	0.000196803	PASS	missense_variant
1:36056280_C/T	13.3268	0.0099385	0.000752674	MISS02	missense_variant
1:36060036_G/A	9.78306	0.0032169	0.000329776	PASS	missense_variant
1:36204823_C/T	13.1489	0.0013774	0.000104888	PASS	missense_variant
1:36214130_A/C	17.0112	0.0048209	0.000284687	PASS	missense_variant
1:36226785_A/G	22.995	0.0013774	6e-05	PASS	missense_variant
1:36499843_A/G	13.9259	0.013116	0.000953448	PASS	missense_variant
1:36550554_G/A	25.4866	0.0011484	4.51e-05	PASS	missense_variant
1:36550788_A/G	13.639	0.016307	0.00121396	PASS	missense_variant
1:36552839_C/T	5.74151	0.0013774	0.000240175	PASS	missense_variant
1:36564213_C/G	4.46833	0.0025629	0.00056491	MISS02	missense_variant
1:36748237_C/T	8.5197	0.0011478	0.00013486	PASS	missense_variant
1:36809737_C/T	15.3047	0.0020969	0.000137279	PASS	missense_variant
1:36809806_T/C	26.8037	0.0032348	0.000121062	PASS	missense_variant
1:36826827_A/G	13.5733	0.0034483	0.000254865	PASS	missense_variant
1:36888959_T/C	17.5359	0.0018365	0.00010491	PASS	splice_region_variant
1:36889071_GA/G	4.81158	0.022291	0.0031163	MISS02	splice_region_variant
1:36921868_C/G	10.4203	0.0048232	0.000464893	PASS	missense_variant
1:36926868_G/C	17.3113	0.013576	0.000794388	PASS	missense_variant
1:37941374_G/A	8.18701	0.0013819	0.000168997	PASS	missense_variant
1:37948128_G/A	29.5114	0.0052801	0.000179835	PASS	missense_variant
1:37948577_T/A	16.3093	0.0038204	0.00023509	MISS02	missense_variant
1:38019751_A/C	3.00739	0.0010183	9.82e-05	MISS02	missense_variant
1:38027778_C/T	9.68296	0.0016077	0.000166274	PASS	missense_variant
1:38033291_C/T	8.02301	0.014469	0.00145375	PASS	missense_variant
1:38039997_G/A	12.7087	0.0036748	0.000290138	PASS	missense_variant
1:38040285_C/T	7.67837	0.0034467	0.000450234	PASS	missense_variant
1:38079393_C/T	14.8204	0.0055122	0.000373855	PASS	missense_variant
1:38184343_T/C	12.1709	0.0073462	0.000607685	PASS	missense_variant
1:38187459_G/A	5.96918	0.0039443	0.000603972	MISS02	missense_variant
1:38188779_C/G	15.3774	0.003908	0.000255071	PASS	missense_variant
1:38192870_G/C	29.6016	0.0014118	4.78e-05	MISS02	missense_variant
1:38197077_A/G	26.4034	0.010944	0.000418903	MISS02	splice_region_variant
1:38227620_C/G	9.36864	0.015179	0.00117793	PASS	missense_variant
1:38227722_G/A	3.18831	0.0059952	0.00188814	MISS02	missense_variant
1:38265265_G/T	13.803	0.0020709	0.000150322	PASS	missense_variant
1:38270005_G/A	17.0475	0.0022957	0.000134957	PASS	missense_variant
1:38357085_C/T	15.3364	0.0011478	7.49e-05	PASS	missense_variant
1:38463514_C/T	14.3739	0.0013806	9e-05	PASS	missense_variant
1:38463685_C/T	11.7998	0.0022967	0.000195049	PASS	missense_variant
1:38464690_G/A	4.94922	0.011024	0.00133561	PASS	missense_variant
1:39305230_T/C	92.1043	0.0013799	1.5e-05	PASS	missense_variant
1:39338760_G/A	4.13521	0.0045732	0.00110977	PASS	splice_region_variant
1:39340761_C/T	4.09709	0.0027574	0.00067442	PASS	missense_variant
1:39500160_C/T	21.4127	0.0016077	7.52e-05	PASS	missense_variant
1:39763362_C/G	13.4306	0.0016077	0.000119883	PASS	missense_variant
1:39765877_T/C	23.6319	0.0088496	0.000377678	MISS02	splice_region_variant
1:39796945_A/G	13.3133	0.0016085	0.000120999	PASS	missense_variant
1:39797101_A/G	19.7593	0.002069	0.000104916	PASS	missense_variant
1:39797544_A/G	5.59392	0.0048232	0.000329726	PASS	missense_variant
1:39798145_A/G	14.8368	0.0068966	0.00046784	PASS	missense_variant
1:39799186_A/G	17.7257	0.0034451	0.00019499	PASS	missense_variant
1:39800567_C/G	19.7162	0.0020661	0.000104998	PASS	missense_variant
1:39801469_A/G	14.709	0.0055096	0.000376506	PASS	missense_variant
1:39802068_T/C	15.3536	0.0011494	7.49e-05	PASS	missense_variant
1:39806489_A/G	30.156	0.0027675	9.2e-05	PASS	missense_variant
1:39847651_G/T	16.2644	0.0041341	0.000255171	PASS	missense_variant
1:39853797_G/T	15.1606	0.016774	0.00112403	PASS	missense_variant
1:39878485_G/A	10.8613	0.0092507	0.000858929	PASS	missense_variant
1:39879590_C/T	12.0127	0.0024594	0.000205196	MISS02	missense_variant
1:39888444_T/C	21.5142	0.003214	0.000149849	PASS	missense_variant
1:39895552_G/A	21.4754	0.001607	7.49e-05	PASS	missense_variant
1:39901440_G/A	21.0172	0.0025299	0.000120664	PASS	splice_region_variant
1:39907732_A/G	16.6019	0.0042155	0.000254926	MISS02	splice_region_variant
1:39991436_G/A	6.56941	0.0013774	0.000209914	PASS	missense_variant
1:40092603_G/A	15.8406	0.016542	0.00106072	MISS02	missense_variant
1:40131787_T/C	5.60161	0.0048298	0.000439287	PASS	missense_variant
1:40150212_A/G	7.60707	0.0032228	0.000424848	PASS	missense_variant
1:40313722_C/T	17.5385	0.0018365	0.000104894	PASS	missense_variant
1:40363321_A/G	34.5422	0.0020661	5.99e-05	PASS	missense_variant
1:40529947_G/T	12.4467	0.0039027	0.000314682	PASS	missense_variant
1:40529954_C/G	9.82283	0.0029995	0.000104932	VQSRTrancheSNP99.60to99.80EXAC	missense_variant
1:40535514_G/A	34.5438	0.0010599	3.07e-05	PASS	missense_variant
1:40703667_C/T	38.4206	0.0034435	8.99e-05	PASS	missense_variant
1:40704120_A/T	9.40271	0.0018382	0.000195819	PASS	missense_variant
1:40717165_C/A	5.04299	0.0043638	0.000377598	PASS	missense_variant
1:40717196_CT/C	14.5391	0.0085057	0.000589694	PASS	frameshift_variant
1:40733512_T/G	8.48067	0.0036731	0.000434522	PASS	missense_variant
1:40756572_G/A	10.3087	0.01056	0.00103424	PASS	missense_variant
1:40766865_T/C	14.2337	0.0036731	0.000258941	PASS	missense_variant
1:40768332_C/A	10.2072	0.0040323	0.000396487	MISS02	missense_variant
1:40769480_T/C	4.01826	0.0094027	0.00235664	PASS	missense_variant
1:40776766_G/A	10.7385	0.001607	0.000149867	PASS	missense_variant
1:40874410_C/T	5.74729	0.001378	0.000240038	PASS	missense_variant
1:40874411_G/A	13.4555	0.013787	0.000930177	PASS	splice_donor_variant
1:40923008_A/G	13.8976	0.021589	0.00158519	PASS	splice_region_variant
1:40923038_C/T	5.30969	0.0036731	0.000119951	PASS	missense_variant
1:40928780_G/A	7.5474	0.04671	0.00645026	PASS	missense_variant
1:40954893_C/T	13.2503	0.0013908	0.000105099	PASS	splice_region_variant
1:40980820_C/T	13.7559	0.0057445	0.00041984	PASS	missense_variant
1:41095006_G/C	10.9463	0.0011478	0.000104966	PASS	missense_variant
1:41107542_C/T	18.1949	0.0013774	7.58e-05	PASS	missense_variant
1:41204615_A/G	16.299	0.016099	0.00100289	PASS	missense_variant
1:41232317_T/C	10.1554	0.013103	0.00130568	PASS	missense_variant
1:41296788_T/C	5.03836	0.0046512	0.00074678	MISS02	missense_variant
1:41485929_C/T	36.4555	0.0033525	9.23e-05	DIFFMISS	missense_variant
1:41503101_C/CCGG	6.21558	0.0043618	0.000704331	PASS	inframe_insertion
1:41608595_T/C	13.8102	0.011264	0.000824242	PASS	missense_variant
1:41978750_G/A	6.6624	0.0057471	0.000290333	PASS	missense_variant
1:42046604_G/C	16.9768	0.0071993	0.000426959	PASS	missense_variant
1:42049469_A/G	21.1994	0.0035769	0.000169304	MISS02	missense_variant
1:42050219_G/A	5.10737	0.001607	0.00031505	PASS	missense_variant
1:42628615_A/G	12.663	0.0055096	0.000437313	PASS	missense_variant
1:42657223_C/T	14.2946	0.011024	0.00077919	PASS	missense_variant
1:42880488_A/G	6.21032	0.001607	0.000194803	PASS	missense_variant
1:42902142_T/C	5.3189	0.026897	0.00516978	PASS	missense_variant
1:42922484_T/A	24.3782	0.0011489	4.72e-05	PASS	stop_gained
1:43102970_C/T	17.4862	0.001844	0.000105638	PASS	missense_variant
1:43108172_C/A	3.88517	0.0090028	0.00182597	MISS02	missense_variant
1:43166460_C/T	7.75782	0.0019503	0	MISS02	missense_variant
1:43201649_C/T	5.89184	0.0012353	0.000209878	PASS	missense_variant
1:43212696_G/A	14.8637	0.0057604	0.000389642	PASS	missense_variant
1:43225072_G/A	29.0703	0.0045956	0.000158791	PASS	splice_region_variant
1:43305713_G/A	7.46182	0.003214	0.000254781	PASS	missense_variant
1:43317037_A/C	26.5896	0.001607	6.05e-05	PASS	missense_variant
1:43394958_C/T	11.9593	0.0039207	0.000270748	MISS02	missense_variant
1:43395570_C/T	35.8058	0.0016077	4.5e-05	PASS	missense_variant
1:43396501_G/C	6.40896	0.0025264	0.000395041	PASS	missense_variant
1:43396854_C/G	23.1651	0.0062241	0.000270295	PASS	missense_variant
1:43630460_G/A	18.6749	0.01057	0.000571721	PASS	missense_variant
1:43647246_C/A	46.0431	0.0020661	4.5e-05	PASS	missense_variant
1:43647422_G/C	22.4701	0.010335	0.000464531	PASS	missense_variant
1:43672586_G/A	12.9815	0.0025253	0.000194984	PASS	missense_variant
1:43748701_C/T	12.7871	0.0057498	0.000452052	PASS	missense_variant
1:43777350_G/A	4.98733	0.0048656	0.000979402	PASS	missense_variant
1:43777674_G/A	9.06308	0.011911	0.00132831	MISS02	missense_variant
1:43803600_T/A	13.3529	0.0075647	0.000570516	MISS02	splice_donor_variant
1:43897381_CTG/C	12.2226	0.0043839	0.000360122	PASS	splice_region_variant
1:43898013_C/T	23.7037	0.014699	0.000628969	MISS02	missense_variant
1:43898722_G/T	18.1727	0.0029871	0.000164838	PASS	missense_variant
1:43902924_CGTT/C	21.4832	0.001607	7.49e-05	PASS	inframe_deletion
1:43907179_C/T	13.1837	0.0013889	0.000105485	PASS	missense_variant
1:43908144_A/G	17.8845	0.0016107	9.02e-05	PASS	missense_variant
1:44019313_G/A	4.88975	0.015438	0.00319647	PASS	splice_region_variant
1:44056763_C/T	10.8905	0.0011478	0.000105504	PASS	missense_variant
1:44056889_C/T	7.03466	0.0032468	0.000462833	MISS02	missense_variant
1:44069737_C/T	11.7379	0.0029844	0.000254949	PASS	missense_variant
1:44069776_G/C	19.4529	0.0043638	0.000225259	PASS	missense_variant
1:44070598_C/T	4.78399	0.0022967	0.000360577	PASS	missense_variant
1:44071273_G/A	10.6302	0.0027561	0.000210558	PASS	missense_variant
1:44071296_A/G	13.7557	0.004136	0.000301832	PASS	splice_region_variant
1:44075054_G/A	12.5339	0.0046125	0.000369572	PASS	splice_region_variant
1:44085522_G/A	14.1828	0.0027701	0.000195819	PASS	missense_variant
1:44085844_C/A	7.28249	0.0078089	0.00107956	PASS	missense_variant
1:44087628_G/A	6.95233	0.0064309	0.000930121	PASS	missense_variant
1:44121415_C/T	15.6906	0.013812	0.000891804	PASS	missense_variant
1:44169413_C/CA	11.5723	0.023941	0.00211509	PASS	splice_region_variant
1:44395840_C/T	13.4642	0.0048209	0.000359658	PASS	missense_variant
1:44415833_A/G	8.05224	0.0010225	0.000127097	MISS02	splice_region_variant
1:44422051_G/A	9.57733	0.0011478	0.000119969	PASS	missense_variant
1:44426605_A/G	16.9454	0.0050551	0.000299742	PASS	missense_variant
1:44436756_C/T	9.23775	0.0062344	0.000678656	PASS	missense_variant
1:44438171_G/A	3.56985	0.0022967	0.000644426	PASS	missense_variant
1:44447549_A/G	9.13357	0.001378	0.000151057	PASS	missense_variant
1:44447579_G/A	12.3402	0.0256	0.0021245	PASS	missense_variant
1:44459620_G/T	8.14963	0.0018374	0.000225822	PASS	missense_variant
1:44461735_C/T	19.3638	0.011019	0.000575061	PASS	missense_variant
1:44595709_G/A	22.3394	0.0036731	0.000165002	PASS	missense_variant
1:44680263_C/T	7.57841	0.0075507	0.000352858	MISS02	missense_variant
1:44680295_T/C	23.5918	0.0032258	0.000137157	PASS	splice_region_variant
1:44684413_C/T	7.708	0.0011743	0.000152504	PASS	missense_variant
1:44878067_G/T	23.1661	0.0041551	0.000180077	PASS	missense_variant
1:45098016_C/G	14.8954	0.0089532	0.000606134	PASS	missense_variant
1:45110690_C/T	14.196	0.015611	0.00111587	PASS	missense_variant
1:45115440_T/C	13.8457	0.0041341	0.000299733	PASS	missense_variant
1:45140057_A/G	75.7134	0.0011585	1.53e-05	PASS	missense_variant
1:45253110_C/T	12.4232	0.0066605	0.000539439	PASS	missense_variant
1:45267540_A/G	22.9158	0.0013806	6.03e-05	PASS	missense_variant
1:45268781_C/T	17.3909	0.0036731	0.000211941	PASS	missense_variant
1:45271740_A/G	6.6664	0.0011905	0.000178763	MISS02	missense_variant
1:45291965_G/A	8.15515	0.0018382	0.000225768	PASS	missense_variant
1:45293391_G/A	7.51283	0.0013793	0.000183812	MISS05	splice_region_variant
1:45293783_G/T	12.5675	0.0020699	0.000165017	PASS	missense_variant
1:45469567_G/A	15.3553	0.0020795	0.000135689	PASS	missense_variant
1:45469813_G/A	14.259	0.0062012	0.000437419	PASS	splice_region_variant
1:45473078_T/TG	3.54584	0.010152	0.0028841	PASS	splice_region_variant
1:45475043_G/A	4.44646	0.0011515	0.000165289	PASS	splice_region_variant
1:45476327_G/C	11.8172	0.0093848	0.000801044	PASS	missense_variant
1:45486320_C/T	21.3064	0.0041379	0.000194979	PASS	missense_variant
1:45524311_C/T	3.39374	0.005977	0.00176864	PASS	missense_variant
1:45797506_T/C	19.2357	0.0033522	0.000174825	MISS02	missense_variant
1:45798439_C/T	15.3406	0.0013774	8.99e-05	PASS	missense_variant
1:45810646_G/A	9.44353	0.0018365	0.000194792	PASS	missense_variant
1:45965212_G/A	13.628	0.024849	0.00186635	PASS	missense_variant
1:46086987_A/C	3.6679	0.0022388	0.000611372	MISS02	missense_variant
1:46087313_G/C	6.96245	0.0032258	0.000315249	PASS	missense_variant
1:46087595_G/A	9.02914	0.0018886	0.000209519	MISS02	missense_variant
1:46099794_C/T	10.2165	0.0013793	0.000135176	PASS	missense_variant
1:46099850_C/T	15.3286	0.0016085	0.000105092	PASS	missense_variant
1:46120277_C/G	46.0514	0.0013787	3e-05	PASS	missense_variant
1:46120855_G/A	3.61775	0.018136	0.00507972	PASS	splice_region_variant
1:46158964_CAT/C	16.1851	0.0045914	0.000284909	PASS	frameshift_variant
1:46206577_T/C	11.0523	0.0038462	0.000249268	PASS	missense_variant
1:46512266_G/A	3.26265	0.0057471	0.00176853	PASS	missense_variant
1:46527719_T/C	7.99375	0.0013799	0.000105045	PASS	missense_variant
1:46654908_C/T	16.1622	0.024816	0.00157203	MISS02	splice_region_variant
1:46662438_G/T	11.4934	0.0013774	0.000119994	PASS	missense_variant
1:46662456_C/T	9.54707	0.044409	0.00484418	PASS	missense_variant
1:46685443_C/T	13.5924	0.0018433	0.000135845	PASS	missense_variant
1:46685585_G/A	8.91009	0.0016114	0.00018111	PASS	missense_variant
1:46746196_C/T	15.9805	0.0013787	7.53e-05	PASS	missense_variant
1:46752178_C/T	99.7184	0.0015966	1.6e-05	PASS	splice_region_variant
1:46763278_C/T	16.932	0.0050505	0.000299706	PASS	missense_variant
1:46768868_G/T	13.445	0.0031729	0.000236686	PASS	missense_variant
1:46806589_TG/T	21.4393	0.0034754	0.000162643	MISS02	frameshift_variant
1:46810815_A/G	17.7979	0.025901	0.00149175	MISS02	missense_variant
1:46860070_C/T	3.13311	0.0031712	0.00101435	PASS	missense_variant
1:46870705_G/A	17.4058	0.010101	0.000585902	PASS	missense_variant
1:46872029_T/A	19.0921	0.0022967	0.000120558	PASS	missense_variant
1:46976735_T/A	5.89777	0.0016077	0.000272959	PASS	missense_variant
1:46978039_C/G	4.11259	0.0039045	0.00032022	PASS	missense_variant
1:47016837_G/A	21.6323	0.0022978	0.000106454	PASS	missense_variant
1:47024318_G/A	23.7747	0.0032169	0.000135726	PASS	missense_variant
1:47024436_A/G	15.3464	0.0029913	0.000195465	PASS	stop_lost
1:47025957_G/A	21.1936	0.0018365	4.51e-05	PASS	splice_region_variant
1:47059779_T/A	13.7965	0.002069	0.000150254	PASS	splice_region_variant
1:47075769_T/C	9.39473	0.0057418	0.000614324	PASS	missense_variant
1:47279573_C/G	46.2443	0.0020804	4.51e-05	PASS	splice_region_variant
1:47280785_G/A	15.0221	0.038018	0.00262392	PASS	missense_variant
1:47402458_C/T	4.78477	0.0051724	0.000998403	MISS02	missense_variant
1:47583432_C/T	7.6927	0.0060213	0.000662232	PASS	splice_region_variant
1:47609053_T/A	71.7646	0.0032243	4.51e-05	MISS02	missense_variant
1:47610141_T/C	10.969	0.00115	0.000104951	MISS05	splice_region_variant
1:47610459_G/T	15.7103	0.0026983	0.000172188	MISS02	missense_variant
1:47611765_G/A	6.96836	0.014233	0.00206773	PASS	missense_variant
1:47689775_G/A	15.9641	0.001378	6e-05	PASS	missense_variant
1:47691497_C/T	11.7602	0.0069541	0.000595113	MISS02	missense_variant
1:47726091_T/C	34.6087	0.0041322	0.000119879	PASS	missense_variant
1:47882453_G/A	10.0869	0.0052947	0.000436327	MISS02	missense_variant
1:48701469_A/G	17.7125	0.0071199	0.000404688	PASS	missense_variant
1:48865099_C/T	10.7738	0.002068	0.000119962	PASS	missense_variant
1:49119006_T/C	10.3251	0.0024658	0.000239349	MISS02	splice_region_variant
1:51253746_G/C	10.2186	0.0013774	0.000134961	PASS	missense_variant
1:51756251_G/A	14.8342	0.0016085	0.000108594	PASS	missense_variant
1:51767399_G/A	6.00566	0.0075897	0.0012718	PASS	missense_variant
1:51778500_G/C	15.3764	0.0043698	0.000285354	PASS	missense_variant
1:51868164_T/A	17.9652	0.0016219	9.04e-05	MISS02	missense_variant
1:51871587_T/G	16.7955	0.0087356	0.000524423	PASS	missense_variant
1:51910628_C/T	17.0211	0.0048254	0.000284789	PASS	missense_variant
1:52231560_C/T	7.8103	0.072577	0.00992028	PASS	missense_variant
1:52285501_T/C	12.6914	0.0011916	9.4e-05	PASS	missense_variant
1:52299824_A/C	10.372	0.006204	0.000601522	PASS	missense_variant
1:52303267_C/T	15.4168	0.0016189	0.000105168	MISS02	stop_gained
1:52306086_C/T	12.2787	0.0055122	0.000451209	PASS	missense_variant
1:52442554_G/C	9.35149	0.007133	0.000767656	PASS	splice_region_variant
1:52490191_G/C	8.69776	0.0027637	0.000318528	PASS	missense_variant
1:52703355_C/T	14.7231	0.018868	0.00130447	PASS	missense_variant
1:52704153_G/A	7.23245	0.01607	0.00225313	PASS	missense_variant
1:52704364_T/C	3.53617	0.0020671	0.000585427	PASS	missense_variant
1:52704648_A/G	91.6044	0.0013787	1.51e-05	PASS	missense_variant
1:52704732_A/G	18.8688	0.0036748	0.000195436	PASS	missense_variant
1:52810458_G/A	15.6077	0.018851	0.0012295	MISS05	missense_variant
1:52828280_C/T	3.42281	0.0020671	0.000149943	PASS	missense_variant
1:52854179_A/G	9.66246	0.01401	0.00146839	PASS	missense_variant
1:52854301_C/T	15.9682	0.0013774	3e-05	PASS	missense_variant
1:52962830_C/T	10.7988	0.0028423	0.000263885	MISS02	missense_variant
1:52991232_T/C	7.18375	0.0014104	0.000196571	MISS02	splice_region_variant
1:52991829_C/T	12.3329	0.0050551	0.000411799	PASS	missense_variant
1:53108665_C/T	7.25312	0.0055198	0.000764664	PASS	stop_gained
1:53370726_C/T	11.4972	0.0013774	0.000119954	PASS	missense_variant
1:53544164_G/T	13.2758	0.0011478	1.52e-05	PASS	missense_variant
1:53546396_G/A	6.65353	0.0034594	0.0002731	PASS	splice_region_variant
1:53559237_G/A	4.61524	0.001213	0.000263075	MISS02	splice_region_variant
1:53676223_A/G	9.15423	0.0013787	0.000150793	PASS	missense_variant
1:53676548_G/T	17.0447	0.0022967	0.000135038	PASS	missense_variant
1:53676583_CAG/C	18.9085	0.0036748	0.000195025	PASS	frameshift_variant
1:53676688_T/C	18.9096	0.0036748	0.000195014	PASS	missense_variant
1:53715167_G/A	11.3496	0.0035195	0.000311098	PASS	missense_variant
1:53715209_C/T	10.7972	0.0024324	0.000225779	MISS02	missense_variant
1:53727885_G/A	11.1831	0.013358	0.0010653	PASS	splice_region_variant
1:53736732_A/G	13.0067	0.0025276	0.000194786	PASS	missense_variant
1:53927197_G/T	12.2507	0.0018442	0.000150793	PASS	missense_variant
1:53932260_C/G	18.4485	0.0027586	0.000149921	PASS	splice_region_variant
1:54060428_C/T	3.38052	0.046249	0.0141416	MISS02	missense_variant
1:54337043_A/G	3.35821	0.013563	0.00407759	PASS	splice_donor_variant
1:54348892_A/G	14.4274	0.0034658	0.000241	MISS02	missense_variant
1:54360178_C/T	15.1092	0.0036799	0.000244394	PASS	missense_variant
1:54371914_G/A	9.15176	0.0048232	0.000529298	PASS	missense_variant
1:54418146_G/T	33.6889	0.0067466	0.000201582	MISS02	splice_donor_variant
1:54423874_A/T	13.8359	0.025506	0.00188815	PASS	missense_variant
1:54427715_G/A	21.9356	0.0022967	0.000104932	PASS	missense_variant
1:54474768_G/A	14.1416	0.014949	0.00107199	PASS	missense_variant
1:54483770_G/C	15.408	0.0053044	0.000345979	PASS	missense_variant
1:54483833_G/T	7.42941	0.012541	0.00170654	PASS	missense_variant
1:54507479_C/T	11.2465	0.0085332	0.000764686	PASS	splice_acceptor_variant
1:54534466_C/A	9.15262	0.017273	0.00165222	MISS02	missense_variant
1:54605336_C/G	17.3742	0.032392	0.00192308	PASS	missense_variant
1:54607025_T/C	76.6634	0.0011489	1.5e-05	PASS	missense_variant
1:54640368_G/A	8.13253	0.0011505	0.000141612	PASS	missense_variant
1:54661141_G/A	13.4108	0.0018408	0.000137497	PASS	missense_variant
1:54661163_G/A	8.74608	0.0018374	0.000210425	PASS	stop_gained
1:54670784_T/C	8.35173	0.0043638	0.000524517	PASS	missense_variant
1:55058276_G/A	13.3034	0.0011484	6e-05	PASS	missense_variant
1:55060298_C/T	21.2103	0.0032169	0.000152133	PASS	missense_variant
1:55075209_A/G	19.0723	0.010575	0.00056008	PASS	missense_variant
1:55075352_G/A	11.4439	0.002069	0.000181138	PASS	missense_variant
1:55081840_T/C	6.78705	0.0050691	0.00075012	PASS	missense_variant
1:55085548_G/A	14.4105	0.0066636	0.000465298	PASS	missense_variant
1:55119552_A/G	3.54604	0.0027574	0.000779143	PASS	missense_variant
1:55119641_A/G	46.0528	0.0013787	3e-05	PASS	missense_variant
1:55119787_C/A	15.2559	0.032794	0.00221755	PASS	missense_variant
1:55119802_C/T	11.9146	0.039897	0.00347562	PASS	missense_variant
1:55152063_G/A	16.6594	0.0059715	0.000360469	PASS	missense_variant
1:55166995_C/T	11.4677	0.0047619	0.000417058	MISS02	splice_region_variant
1:55167762_G/C	6.54309	0.0018957	9.8e-05	MISS02	splice_acceptor_variant
1:55174729_G/A	13.615	0.010106	0.000749288	PASS	missense_variant
1:55183212_A/G	3.70333	0.0032228	0.000289299	PASS	missense_variant
1:55223760_C/A	10.565	0.0069348	0.000660542	PASS	missense_variant
1:55223948_T/C	24.5782	0.0018382	7.49e-05	PASS	missense_variant
1:55224704_C/T	12.1569	0.0018374	0.000151396	PASS	missense_variant
1:55271898_G/A	6.19723	0.0012634	0.000204082	PASS	splice_region_variant
1:55337284_G/A	11.6365	0.0064279	0.000555656	PASS	splice_region_variant
1:55505603_G/GGAGGAC	3.5227	0.002015	0.000572831	VQSRTrancheINDEL99.00to99.50EXAC	inframe_insertion
1:55518419_GT/G	14.8919	0.001378	9.27e-05	PASS	missense_variant
1:55525151_ACT/A	4.364	0.0062167	0.0014314	PASS	splice_region_variant
1:55547090_C/T	18.4416	0.0027574	0.000149912	PASS	missense_variant
1:55549461_T/C	5.04836	0.0015068	0.000298835	MISS02	missense_variant
1:55560999_A/T	10.1074	0.0032258	0.000320082	PASS	missense_variant
1:57185906_ATTC/A	7.19277	0.0025276	0.000120926	PASS	inframe_deletion
1:57209907_C/A	7.65722	0.034713	0.00467444	PASS	stop_gained
1:57224387_A/T	8.32089	0.0065421	0.000790778	MISS02	splice_donor_variant
1:57254757_G/A	6.32246	0.039165	0.00640578	PASS	missense_variant
1:57257951_G/A	14.0959	0.0025311	0.000179986	PASS	missense_variant
1:57333369_C/A	22.0975	0.0029858	0.000135505	PASS	missense_variant
1:57399068_T/C	9.92574	0.0025264	0.00025511	PASS	missense_variant
1:57489239_C/T	4.64021	0.097067	0.0226429	PASS	missense_variant
1:58999853_T/C	11.2921	0.0098987	0.000884584	PASS	missense_variant
1:58999978_A/G	6.52745	0.0039082	0.00048483	MISS02	missense_variant
1:59004599_T/C	7.67316	0.0013787	0.000179894	PASS	missense_variant
1:59142603_C/G	10.2478	0.0013812	0.000134949	PASS	missense_variant
1:59147851_G/A	9.86546	0.0020699	0.000210204	PASS	missense_variant
1:60228246_A/G	13.2389	0.0041322	0.000313322	PASS	missense_variant
1:60333941_C/T	10.4302	0.0020699	0.000198825	MISS05	missense_variant
1:60373592_C/T	6.5705	0.001378	0.000209971	PASS	missense_variant
1:60377982_T/C	25.9214	0.0011699	4.52e-05	MISS02	splice_region_variant
1:60505800_G/A	3.5517	0.0018391	0.000299904	PASS	missense_variant
1:60506698_C/T	14.4545	0.0071232	0.000496091	PASS	missense_variant
1:60506761_C/T	15.3459	0.002302	0.000150331	PASS	missense_variant
1:62190717_C/G	9.34696	0.0029871	0.000320435	PASS	missense_variant
1:62240882_G/C	19.2652	0.0011574	6.01e-05	MISS02	missense_variant
1:62253583_C/A	3.77176	0.016529	0.00443618	PASS	missense_variant
1:62299365_G/T	9.75311	0.0016085	0.00016516	PASS	missense_variant
1:62545237_A/AT	17.9216	0.0016107	9e-05	PASS	frameshift_variant
1:62593645_A/C	11.5163	0.0034451	0.000300093	PASS	missense_variant
1:62676991_T/G	11.6269	0.010614	0.000921829	PASS	missense_variant
1:62713203_C/T	27.4272	0.0020671	7.55e-05	PASS	missense_variant
1:62728902_A/G	3.25721	0.0050715	0.00133718	PASS	missense_variant
1:62732457_G/A	7.23643	0.0020671	0.000286162	PASS	missense_variant
1:62739928_G/A	11.402	0.0085411	0.000754968	PASS	missense_variant
1:62740031_C/A	19.7032	0.0020661	0.000105067	PASS	missense_variant
1:62907214_A/G	20.8281	0.0043618	0.000210292	PASS	missense_variant
1:62910957_G/C	5.94724	0.0091912	0.00143025	PASS	missense_variant
1:62913188_C/T	13.5615	0.0018519	0.000136791	MISS02	splice_region_variant
1:62915972_C/G	21.8797	0.011034	0.000509669	PASS	missense_variant
1:62916290_A/G	7.23604	0.01908	0.00268088	PASS	missense_variant
1:62916503_G/A	4.61219	0.0041341	0.000899254	PASS	missense_variant
1:62962066_T/C	21.1892	0.0018374	7.5e-05	PASS	missense_variant
1:63052299_T/C	18.0126	0.0016272	9.05e-05	MISS02	splice_region_variant
1:63063465_C/G	4.94382	0.013339	0.00272714	PASS	missense_variant
1:63069736_A/G	13.2823	0.0034467	0.000255156	PASS	missense_variant
1:63307109_G/A	5.44193	0.0023031	0.000424011	PASS	missense_variant
1:63999293_A/G	12.7456	0.0011068	4.52e-05	MISS05	missense_variant
1:64104430_C/T	9.14069	0.0043658	0.000479487	PASS	missense_variant
1:64608211_G/A	4.79211	0.0011478	0.000239736	PASS	missense_variant
1:64643892_G/C	4.51103	0.0011484	0.000254804	PASS	missense_variant
1:64680581_A/C	3.61175	0.0043618	0.000839278	PASS	missense_variant
1:65095158_G/C	12.5796	0.024182	0.00196608	PASS	missense_variant
1:65137321_T/A	19.9727	0.0029844	0.000149849	PASS	missense_variant
1:65278472_C/T	16.8489	0.0052825	0.000315088	PASS	missense_variant
1:65348981_T/C	11.0585	0.010825	0.000988623	PASS	missense_variant
1:65886421_A/C	14.0553	0.0010309	7.34e-05	PASS	missense_variant
1:66101898_A/G	3.71911	0.001607	0.000404688	PASS	missense_variant
1:66833622_C/A	15.3455	0.0025287	0.000165175	PASS	splice_region_variant
1:67147837_C/T	13.0744	0.0013774	0.000105485	PASS	missense_variant
1:67266824_T/A	6.9898	0.0045935	0.000659769	PASS	missense_variant
1:67292666_C/A	6.13467	0.0013774	0.000224786	PASS	missense_variant
1:67356955_A/C	4.43414	0.0011505	0.000180056	PASS	splice_region_variant
1:67450416_G/A	11.5023	0.0020661	0.000179964	PASS	missense_variant
1:67558869_CTCATT/C	3.26758	0.028237	0.00881427	PASS	frameshift_variant
1:67861350_T/A	5.03413	0.0073496	0.0014686	PASS	missense_variant
1:68904660_A/C	3.19583	0.0041322	0.00122865	PASS	missense_variant
1:68910315_C/T	12.2424	0.019991	0.00166347	PASS	missense_variant
1:68912480_C/T	17.268	0.0020661	0.000119883	PASS	missense_variant
1:68949654_C/T	19.4499	0.0020576	0.000105996	PASS	missense_variant
1:68955257_G/A	17.4509	0.0010499	6.02e-05	PASS	stop_gained
1:70493987_C/T	7.13015	0.001607	0.000225693	PASS	missense_variant
1:70625071_G/A	4.96706	0.017019	0.00347359	PASS	missense_variant
1:70641610_T/C	15.974	0.0021541	0.000135123	MISS02	missense_variant
1:70697889_G/GTT	18.3339	0.0051838	0.000284137	PASS	frameshift_variant
1:70819919_T/C	19.7327	0.0041341	0.00021033	PASS	missense_variant
1:70895474_C/T	22.6872	0.0027586	0.000121914	PASS	splice_region_variant
1:71318546_G/C	5.78854	0.012632	0.00220529	PASS	splice_region_variant
1:74670812_A/G	19.092	0.0011489	6.02e-05	PASS	missense_variant
1:74671185_C/T	21.3194	0.0018391	5.99e-05	PASS	missense_variant
1:74957823_CCTT/C	10.341	0.0013973	0.000135294	MISS02	inframe_deletion
1:75037334_C/G	8.19946	0.0036748	0.000449627	PASS	missense_variant
1:75038608_T/C	15.4169	0.0062012	0.000404579	PASS	missense_variant
1:75065396_A/G	15.972	0.0013953	7.57e-05	PASS	missense_variant
1:75108757_T/G	18.3037	0.0013819	7.56e-05	PASS	missense_variant
1:75171980_T/C	4.58337	0.0011933	6.1e-05	MISS02	stop_lost
1:75172042_C/T	4.14768	0.0022999	0.000555472	PASS	missense_variant
1:75188942_C/T	18.6447	0.0019531	0.000104948	MISS02	missense_variant
1:75199028_G/A	29.8121	0.0066636	0.000224969	PASS	missense_variant
1:75218014_C/A	10.2473	0.0036765	0.000359971	PASS	missense_variant
1:75685528_T/A	25.8202	0.0016077	6.24e-05	PASS	missense_variant
1:76262773_C/A	4.80957	0.0043678	0.000432165	PASS	missense_variant
1:76378459_C/T	10.5718	0.0020728	0.000196438	MISS02	stop_gained
1:76384785_G/A	13.4094	0.0050528	0.000378581	PASS	missense_variant
1:76877850_T/G	38.3213	0.0011484	3e-05	PASS	missense_variant
1:77334176_C/T	4.02181	0.0037771	0.000941827	MISS02	splice_region_variant
1:78001642_C/G	45.8879	0.0013774	3.01e-05	PASS	missense_variant
1:78044542_C/T	18.8944	0.0012042	6.38e-05	MISS02	missense_variant
1:78047468_C/T	17.4543	0.0018433	0.000105791	PASS	missense_variant
1:78325817_C/T	7.63792	0.0027855	0.000365578	MISS02	splice_region_variant
1:78340569_T/A	23.5703	0.0039027	0.000166198	PASS	missense_variant
1:78392569_C/T	12.0847	0.0018365	0.000152226	PASS	missense_variant
1:78395029_C/G	6.359	0.0011489	0.000180848	PASS	missense_variant
1:78511960_C/T	3.47473	0.0034514	0.000674002	MISS02	missense_variant
1:79121088_C/G	22.1505	0.0029871	0.000135241	PASS	stop_gained
1:82431756_G/T	3.52579	0.0032184	0.000914927	PASS	missense_variant
1:82450382_C/A	9.86353	0.002069	0.000210153	PASS	missense_variant
1:84373276_G/A	15.4443	0.022989	0.00152122	PASS	missense_variant
1:84403547_C/T	10.6213	0.0018374	9e-05	PASS	stop_gained
1:84768920_G/C	7.64258	0.001378	0.000180522	PASS	start_lost
1:84944968_G/A	66.127	0.0012291	1.86e-05	MISS02	missense_variant
1:84944992_A/T	18.6735	0.029708	0.00163694	MISS02	missense_variant
1:85020683_C/G	3.56338	0.0055198	0.000390555	PASS	stop_lost
1:85029489_T/A	4.00392	0.0048298	0.00111078	PASS	missense_variant
1:85124142_C/T	13.2942	0.0087397	0.000662766	PASS	missense_variant
1:85510985_C/T	9.19076	0.0091827	0.00100737	PASS	missense_variant
1:85573866_T/C	13.8802	0.0033819	0.000244417	PASS	splice_region_variant
1:85589914_A/G	4.53735	0.0029844	0.000659275	PASS	missense_variant
1:85647866_T/C	9.64398	0.0030075	0.00024966	MISS02	missense_variant
1:85648161_G/A	13.2463	0.0016099	0.000121717	PASS	stop_gained
1:85656199_G/C	23.7344	0.003908	0.000165274	PASS	missense_variant
1:85742023_C/A	3.21171	0.087869	0.0291211	PASS	missense_variant
1:86173600_C/T	21.5078	0.003214	0.000149894	PASS	missense_variant
1:86211194_G/A	12.0632	0.0025357	0.000210691	MISS02	splice_region_variant
1:86249998_G/C	20.0534	0.0048209	0.000241509	PASS	missense_variant
1:86340342_G/A	3.03805	0.0011494	0.000378627	PASS	missense_variant
1:86362031_A/G	13.113	0.0052849	0.000405004	PASS	splice_region_variant
1:86426963_T/G	30.5575	0.0013774	4.51e-05	PASS	missense_variant
1:86488251_C/T	9.30732	0.014692	0.00159952	PASS	missense_variant
1:86512512_C/G	10.9481	0.0011484	0.000105004	PASS	missense_variant
1:86590955_C/T	9.47444	0.0041379	0.000285157	PASS	missense_variant
1:86822204_C/T	15.3545	0.0029858	0.000195002	PASS	missense_variant
1:86838177_C/T	3.26787	0.0012827	0.000392868	PASS	missense_variant
1:86898048_T/G	7.72246	0.015424	0.00202447	PASS	splice_region_variant
1:86909555_T/C	5.20726	0.018374	0.00358171	PASS	missense_variant
1:86909659_C/T	12.7702	0.0011478	9e-05	PASS	missense_variant
1:86913263_C/T	4.93747	0.0029858	0.000269728	PASS	missense_variant
1:86913269_T/A	23.0312	0.0013787	5.99e-05	PASS	missense_variant
1:86916350_A/G	7.75866	0.011949	0.000854573	PASS	missense_variant
1:86916402_G/C	18.4834	0.0016667	9.03e-05	MISS02	missense_variant
1:86951099_G/A	8.94716	0.001607	0.000179867	PASS	missense_variant
1:86954700_A/G	7.75575	0.014956	0.00195383	PASS	missense_variant
1:86959928_C/T	17.5583	0.01173	0.000675534	PASS	missense_variant
1:87026017_A/C	9.93871	0.0029913	0.000301787	PASS	missense_variant
1:87033294_G/A	14.341	0.0062327	0.000437142	PASS	missense_variant
1:87038452_A/G	4.17335	0.0024248	0.000582093	MISS02	missense_variant
1:87333769_A/G	11.3937	0.0025822	0.000227169	MISS02	missense_variant
1:87569249_G/A	10.7589	0.0016159	0.000150412	PASS	missense_variant
1:87570315_A/T	15.3203	0.001607	0.000105051	PASS	missense_variant
1:87599351_C/A	15.9185	0.0062012	0.000391836	PASS	missense_variant
1:87599362_C/T	16.5533	0.02788	0.00172956	PASS	missense_variant
1:89206774_G/A	16.1585	0.018859	0.00118815	PASS	missense_variant
1:89250359_C/G	11.7028	0.0069995	0.000601956	MISS02	missense_variant
1:89251820_C/T	13.9574	0.0022978	0.000164982	PASS	missense_variant
1:89329804_A/AT	11.747	0.0029858	0.000254873	PASS	splice_region_variant
1:89427086_G/A	8.3676	0.001378	0.000164883	PASS	missense_variant
1:89475123_T/C	13.1982	0.0055096	0.000419589	PASS	missense_variant
1:89481070_G/C	15.347	0.0016085	0.000104966	PASS	missense_variant
1:89525049_C/T	13.3158	0.0022957	0.000134852	PASS	missense_variant
1:89579985_A/C	17.4266	0.015385	0.00089584	MISS05	splice_region_variant
1:89586833_A/C	17.2809	0.002069	0.000119962	PASS	missense_variant
1:89657066_T/C	5.42176	0.0027561	0.000509485	PASS	missense_variant
1:89662987_C/A	12.2086	0.0080906	0.000667658	PASS	missense_variant
1:89732754_T/G	20.4654	0.0085175	0.000419589	PASS	missense_variant
1:89834252_C/T	6.39011	0.007133	0.000704732	PASS	missense_variant
1:89848275_CTGTTCA/C	3.07552	0.0050528	0.00164853	PASS	inframe_deletion
1:90398850_G/A	10.8493	0.0027586	0.000254903	PASS	missense_variant
1:90398961_A/G	11.7323	0.0029844	0.000255071	PASS	missense_variant
1:91382455_C/T	19.4914	0.017241	0.000899254	PASS	missense_variant
1:91403290_A/G	3.1953	0.0022957	0.000719597	PASS	missense_variant
1:91779005_T/G	7.64508	0.0013799	0.000180712	PASS	missense_variant
1:91840963_A/G	17.8332	0.0016085	9.03e-05	PASS	missense_variant
1:91846525_T/C	12.2394	0.0018425	0.000150793	MISS05	missense_variant
1:91859652_T/C	27.115	0.0013096	4.84e-05	PASS	splice_region_variant
1:92178103_T/C	21.9381	0.0029844	0.000136426	PASS	splice_region_variant
1:92187652_A/G	9.91213	0.009876	0.00100528	PASS	missense_variant
1:92445240_G/A	20.8021	0.0098805	0.000479487	PASS	missense_variant
1:92446446_T/C	21.2978	0.0054502	0.000257241	MISS02	splice_region_variant
1:92446466_A/G	16.8475	0.002792	0.000166158	MISS02	missense_variant
1:92446887_C/T	9.94206	0.0029844	0.000300987	PASS	missense_variant
1:92712095_T/C	12.4627	0.0013787	0.000110767	PASS	missense_variant
1:92733696_A/G	29.8068	0.0013895	4.67e-05	MISS02	splice_region_variant
1:92755748_T/C	19.0497	0.0011484	6.04e-05	PASS	splice_region_variant
1:92756989_C/T	4.37896	0.01108	0.0025521	PASS	missense_variant
1:92772741_T/C	5.74115	0.0016174	0.000282097	PASS	splice_region_variant
1:92846322_G/A	6.96249	0.0035562	0.000512326	MISS02	missense_variant
1:92946172_T/C	4.94556	0.0022535	0.000456482	PASS	missense_variant
1:92946513_G/C	4.0834	0.0017623	0.000256885	MISS02	missense_variant
1:93029245_T/C	23.4535	0.010101	0.000434887	PASS	missense_variant
1:93029275_T/G	8.15584	0.0020756	0.000254957	PASS	missense_variant
1:93070902_C/A	24.5466	0.0018365	7.49e-05	PASS	missense_variant
1:93089891_G/A	8.32542	0.0013787	0.000165802	PASS	missense_variant
1:93159881_T/TGC	18.4093	0.010124	0.000555255	PASS	frameshift_variant
1:93160880_A/G	7.73304	0.021659	0.00212083	PASS	missense_variant
1:93646181_C/T	10.2644	0.0088545	0.000869594	MISS05	missense_variant
1:93682193_A/T	5.25908	0.0028661	0.000393937	PASS	missense_variant
1:93683379_A/G	9.17014	0.0013774	0.00015039	PASS	missense_variant
1:93687292_A/G	8.33579	0.0023776	0.000285826	MISS02	missense_variant
1:93712465_G/C	9.68747	0.0078508	0.000816154	PASS	missense_variant
1:94033042_G/A	5.32201	0.018178	0.00256873	PASS	missense_variant
1:94037394_T/G	11.2476	0.0069252	0.000619616	PASS	missense_variant
1:94041602_C/T	10.9536	0.0011478	0.000104897	PASS	missense_variant
1:94047850_G/C	9.48206	0.0011617	0.000122643	PASS	splice_region_variant
1:94048027_G/A	15.3699	0.0025287	0.000164913	PASS	missense_variant
1:94054877_C/T	14.0851	0.0052825	0.000376892	PASS	missense_variant
1:94140377_T/A	17.2713	0.0023343	0.000135452	MISS02	missense_variant
1:94466604_C/T	12.7984	0.0034435	0.000269914	PASS	missense_variant
1:94473807_C/T	4.24589	0.019752	0.00472335	PASS	missense_variant
1:94485278_C/T	4.9586	0.0062212	0.00070669	MISS02	missense_variant
1:94490550_C/T	18.7703	0.0025253	0.00013486	PASS	missense_variant
1:94496053_G/A	6.37641	0.0018365	0.000209826	PASS	missense_variant
1:94496666_G/A	5.27752	0.0018408	0.000349321	PASS	missense_variant
1:94502756_G/A	13.7133	0.0073563	0.000540119	PASS	missense_variant
1:94505638_C/T	12.6308	0.0056206	0.000447307	PASS	missense_variant
1:94543389_C/T	4.15581	0.0061983	0.00149853	PASS	missense_variant
1:94643526_T/G	11.1595	0.0018365	0.000164843	PASS	missense_variant
1:94643587_G/A	11.9392	0.0016077	0.000134856	PASS	missense_variant
1:94649851_T/C	7.75234	0.001991	0.000257272	DIFFMISS	splice_region_variant
1:94697167_T/C	9.19381	0.0020737	0.000225972	PASS	start_lost
1:94996033_G/A	6.91796	0.0071264	0.000794412	PASS	missense_variant
1:97189154_G/A	9.96165	0.0071199	0.000719338	PASS	splice_region_variant
1:97771841_C/A	9.18476	0.0013774	0.00015015	PASS	missense_variant
1:97915615_G/A	15.4168	0.0073462	0.000479803	PASS	missense_variant
1:100155132_T/A	25.627	0.0045935	0.00018004	PASS	missense_variant
1:100155425_A/G	15.2388	0.0032178	0.000211795	MISS02	missense_variant
1:100214152_A/G	11.7485	0.0029844	0.00025472	PASS	missense_variant
1:100316684_A/C	11.5296	0.0041322	0.000359755	PASS	splice_region_variant
1:100349983_C/T	3.69328	0.01474	0.0040344	PASS	missense_variant
1:100378008_G/A	5.9544	0.0011484	0.000135164	PASS	missense_variant
1:100476986_G/C	9.53005	0.015639	0.00166432	PASS	missense_variant
1:100483370_A/G	10.3367	0.0012456	0.000120638	PASS	missense_variant
1:100605964_G/A	15.3438	0.0013793	9e-05	PASS	missense_variant
1:100606023_A/G	10.9265	0.0078053	0.000719446	PASS	missense_variant
1:100606444_C/A	11.7687	0.015158	0.00130611	PASS	missense_variant
1:100620728_G/A	7.95383	0.0030079	0.000379167	MISS02	stop_gained
1:100736135_G/A	11.9628	0.0011484	6e-05	PASS	missense_variant
1:100738983_A/G	3.32297	0.0026366	0.000385117	MISS02	missense_variant
1:100740507_G/A	12.4859	0.0029885	0.00024001	PASS	missense_variant
1:100928377_G/A	16.2085	0.047148	0.00304348	PASS	missense_variant
1:100949904_G/A	9.24181	0.017717	0.00194782	MISS02	missense_variant
1:100964598_C/T	15.324	0.0034451	0.000225544	PASS	missense_variant
1:101198205_G/A	8.99536	0.0014098	0.000156922	MISS02	missense_variant
1:102312417_G/A	11.7163	0.019761	0.00171767	PASS	missense_variant
1:103345315_C/T	5.48553	0.0034435	0.000629515	PASS	missense_variant
1:103355059_G/T	4.41297	0.018136	0.00416817	PASS	missense_variant
1:103377744_C/T	8.0891	0.0069767	0.000867788	MISS02	missense_variant
1:103470167_C/T	14.0184	0.0078125	0.000561377	PASS	missense_variant
1:103480155_G/T	12.2981	0.0068902	0.000563835	PASS	splice_region_variant
1:103491824_T/C	14.9083	0.0066605	0.000449559	PASS	missense_variant
1:103491882_G/T	11.4961	0.0013774	0.000119965	PASS	missense_variant
1:103548489_T/C	5.1234	0.0011515	0.000224962	PASS	missense_variant
1:104114881_A/G	15.4365	0.0043839	0.000285165	MISS02	splice_region_variant
1:107600427_CAGG/C	3.87167	0.005612	0.00145556	MISS02	inframe_deletion
1:107973414_A/G	16.4507	0.0059715	0.000365041	PASS	missense_variant
1:108298086_C/T	11.5308	0.0055096	0.000480233	PASS	missense_variant
1:108417536_C/T	11.8302	0.0039062	0.000331375	PASS	missense_variant
1:108700078_G/C	11.5125	0.0020699	0.000180137	PASS	splice_region_variant
1:108703916_C/T	27.2475	0.0032664	0.000120257	MISS02	splice_acceptor_variant
1:108724588_G/T	9.58308	0.0011478	0.000119897	PASS	stop_gained
1:109192990_C/T	8.81097	0.0018484	0.000210128	PASS	missense_variant
1:109242012_AAGTCGC/A	3.96036	0.001607	0.000406259	VQSRTrancheINDEL97.00to99.00	inframe_deletion
1:109276094_G/T	11.1625	0.0018382	0.000164952	PASS	missense_variant
1:109385778_C/T	9.20563	0.0020671	0.000224962	PASS	missense_variant
1:109477392_G/C	11.3277	0.0032154	0.000284687	PASS	missense_variant
1:109477470_G/A	7.16418	0.0027574	0.000105023	PASS	missense_variant
1:109484082_C/T	99.7828	0.0029844	3e-05	PASS	missense_variant
1:109533889_G/A	19.5153	0.003214	0.000165195	PASS	missense_variant
1:109560228_A/G	15.8909	0.019755	0.00126662	MISS02	splice_region_variant
1:109656870_T/A	3.58526	0.0012107	0.000337983	MISS02	missense_variant
1:109742531_G/A	7.40497	0.0091827	0.000509638	PASS	missense_variant
1:109793480_C/T	15.8417	0.0073462	0.000466938	PASS	missense_variant
1:109793483_C/T	4.42602	0.0011478	0.000195824	PASS	missense_variant
1:109794493_G/A	9.57171	0.0011484	0.000120102	PASS	missense_variant
1:109794785_C/T	15.2939	0.0013787	9.03e-05	PASS	missense_variant
1:109795123_G/A	14.4293	0.0036731	0.000255432	PASS	missense_variant
1:109805764_G/A	12.6472	0.0011531	9.13e-05	PASS	missense_variant
1:109805810_T/C	3.08192	0.0050575	0.000257763	PASS	missense_variant
1:109806946_C/T	18.3161	0.0027599	0.000151076	PASS	missense_variant
1:109823798_C/G	14.0569	0.0041551	0.000296736	MISS02	missense_variant
1:109837853_G/A	3.27478	0.040248	0.0126438	PASS	missense_variant
1:109839510_G/T	13.4256	0.001607	0.000119875	PASS	missense_variant
1:109865614_C/T	16.5271	0.0032154	0.000195142	PASS	missense_variant
1:109897147_A/C	21.4662	0.0016174	7.55e-05	PASS	missense_variant
1:109910100_T/C	4.26454	0.018236	0.00433674	PASS	missense_variant
1:110029655_C/G	25.0683	0.0011743	4.69e-05	MISS02	missense_variant
1:110163824_C/A	12.0798	0.0025725	0.000213462	MISS02	missense_variant
1:110211558_G/A	30.6901	0.0018365	5.99e-05	MISS05	missense_variant
1:110211933_A/G	3.93439	0.008494	0.00217268	VQSRTrancheSNP99.60to99.80EXAC	missense_variant
1:110280369_T/C	39.1842	0.0012013	3.07e-05	MISS02	missense_variant
1:110293323_G/A	5.97165	0.0011484	7.51e-05	PASS	stop_gained
1:110294385_C/T	17.762	0.0087316	0.000495674	PASS	missense_variant
1:110527700_T/C	5.78182	0.0027726	0.00048064	MISS02	missense_variant
1:110737204_G/A	13.1714	0.0080571	0.0006163	PASS	missense_variant
1:110740129_G/A	7.96536	0.0027586	0.000137935	PASS	missense_variant
1:110740758_G/A	15.2782	0.0025287	0.000165903	PASS	missense_variant
1:110754364_G/GGGTAGCAGC	29.1969	0.0043353	0.000149109	VQSRTrancheINDEL96.00to97.00	inframe_insertion
1:110775470_G/A	6.75277	0.0068365	0.00101833	PASS	splice_acceptor_variant
1:110882536_A/G	4.52063	0.0094427	0.00210428	PASS	missense_variant
1:110884333_A/G	17.8979	0.0016092	9e-05	PASS	missense_variant
1:110919577_C/T	12.4285	0.0023031	0.000125192	PASS	missense_variant
1:110921843_T/G	6.97804	0.0022957	0.000329637	PASS	missense_variant
1:110950355_G/A	16.8066	0.011478	0.0006904	PASS	missense_variant
1:110993918_G/A	22.3246	0.0036731	0.000165111	PASS	splice_region_variant
1:110996698_G/C	4.0127	0.0013941	0.000116179	MISS02	missense_variant
1:111060935_T/C	9.96334	0.0050528	0.000509455	PASS	missense_variant
1:111061360_T/C	16.6968	0.016008	0.000973394	MISS02	missense_variant
1:111494653_G/C	17.7735	0.012632	0.000719295	PASS	missense_variant
1:111730899_G/T	11.2018	0.008494	0.000764182	PASS	missense_variant
1:111741367_A/G	15.2295	0.001378	9.06e-05	PASS	splice_region_variant
1:111777529_G/A	12.005	0.0020709	0.000165165	PASS	splice_region_variant
1:111777575_A/G	3.36676	0.047509	0.0145988	PASS	missense_variant
1:111863034_C/G	7.62694	0.0027561	0.000362231	PASS	missense_variant
1:111863038_C/T	10.8702	0.0011478	0.000105702	PASS	stop_gained
1:111890290_C/T	30.8545	0.0027714	9.01e-05	MISS02	splice_region_variant
1:112042729_C/T	17.8895	0.001607	9e-05	PASS	missense_variant
1:112045622_G/T	3.42515	0.0013819	0.000403852	PASS	splice_region_variant
1:112269787_C/A	16.3377	0.0039045	0.000239866	PASS	missense_variant
1:112999294_G/T	12.3573	0.0046104	0.000374678	PASS	missense_variant
1:113058815_G/A	10.9598	0.0011489	0.000104938	PASS	missense_variant
1:113093246_G/A	13.632	0.0036731	0.000270368	PASS	missense_variant
1:113197201_G/A	25.4582	0.0075758	0.00029976	PASS	missense_variant
1:113209774_A/G	18.5151	0.0013882	7.51e-05	MISS02	splice_region_variant
1:113241069_G/A	38.0901	0.001151	3.03e-05	PASS	missense_variant
1:113244160_T/G	6.69729	0.001607	0.000240276	PASS	missense_variant
1:113252894_C/T	12.3478	0.0021347	3.08e-05	MISS02	missense_variant
1:113460521_G/T	18.8389	0.0014238	7.57e-05	MISS02	missense_variant
1:113637055_A/G	11.2178	0.0043618	0.000390379	PASS	missense_variant
1:113641328_G/C	15.3353	0.0013787	9e-05	PASS	missense_variant
1:113653034_C/T	9.03503	0.0022967	0.00025472	PASS	missense_variant
1:113653035_G/A	14.7631	0.016552	0.00113875	PASS	missense_variant
1:113657262_C/T	15.2608	0.01931	0.00128858	PASS	missense_variant
1:113658932_A/T	16.1867	0.0048365	0.000300156	PASS	missense_variant
1:114214380_C/T	15.3706	0.0055096	0.000360306	PASS	missense_variant
1:114243565_G/A	16.9017	0.0058113	0.000345719	MISS02	stop_gained
1:114281424_AG/A	9.59823	0.0020131	0.000210116	MISS05	splice_region_variant
1:114340340_T/C	8.4837	0.0025253	0.000210021	PASS	missense_variant
1:114377610_C/A	3.21633	0.0016411	0.000510817	PASS	missense_variant
1:114454467_C/T	7.98063	0.0013774	0.000135001	PASS	missense_variant
1:114454742_A/T	10.586	0.024805	0.00239703	PASS	missense_variant
1:114516075_A/G	9.00462	0.0016294	0.000181214	PASS	missense_variant
1:114516085_C/G	8.41787	0.0014032	0.000166899	PASS	missense_variant
1:114523753_G/T	6.09234	0.0078233	0.00129257	PASS	missense_variant
1:115005857_C/T	38.8442	0.0019316	4.98e-05	PASS	splice_region_variant
1:115137100_A/G	15.3612	0.0027561	0.000179883	PASS	missense_variant
1:115142073_C/CT	22.9638	0.0013857	6.04e-05	PASS	splice_acceptor_variant
1:115151416_A/G	38.3415	0.0011478	3e-05	PASS	missense_variant
1:115151492_G/C	15.4056	0.018161	0.00119922	PASS	missense_variant
1:115217379_T/A	5.11269	0.001378	0.000269825	PASS	missense_variant
1:115218260_A/T	3.72298	0.0050575	0.0013635	PASS	missense_variant
1:115226973_C/T	22.926	0.0013774	6.02e-05	PASS	missense_variant
1:115229523_C/T	5.05635	0.025023	0.0050502	PASS	missense_variant
1:115524018_T/A	38.4035	0.0011547	3.01e-05	PASS	missense_variant
1:116202263_G/A	12.7036	0.014463	0.00115387	PASS	missense_variant
1:116247824_C/T	6.43509	0.0052801	0.000824192	PASS	missense_variant
1:116275561_G/C	7.069	0.011494	0.000914378	PASS	missense_variant
1:116534797_C/T	9.97593	0.0038059	0.000382819	MISS02	missense_variant
1:116939323_G/A	19.4608	0.0023652	0.00012181	MISS02	missense_variant
1:117122291_C/G	15.9659	0.033757	8.05e-05	MISS02	missense_variant
1:117146542_C/T	17.2349	0.0091912	0.000537948	PASS	missense_variant
1:117492067_T/G	10.6848	0.0036748	0.000345076	PASS	missense_variant
1:117552675_G/A	18.1094	0.0045935	0.000254758	PASS	missense_variant
1:117556271_T/C	14.3468	0.018399	0.00130478	PASS	missense_variant
1:117560927_A/G	10.5868	0.0050551	0.000479688	PASS	missense_variant
1:117568200_G/A	8.90867	0.0032273	0.000363306	PASS	missense_variant
1:117576475_G/A	9.06663	0.0023063	0.000254895	PASS	splice_region_variant
1:117602975_G/C	13.1016	0.0021802	0.000166742	MISS02	missense_variant
1:117619365_G/A	16.8666	0.014476	0.000870113	PASS	missense_variant
1:117632685_G/A	12.9893	0.0025287	0.000195131	PASS	missense_variant
1:117635401_G/A	3.6002	0.039522	0.0113003	PASS	missense_variant
1:117660839_T/C	10.9716	0.0022967	0.000209769	PASS	missense_variant
1:117661318_T/C	10.5287	0.0022978	0.000218695	PASS	missense_variant
1:118042046_T/A	18.6457	0.0050645	0.000272926	PASS	missense_variant
1:118439462_G/A	10.7388	0.0016219	0.000151254	PASS	stop_gained
1:118476052_G/A	4.44681	0.0029844	0.000284695	PASS	missense_variant
1:118479396_C/T	9.26076	0.0013902	0.000150304	PASS	missense_variant
1:118483784_G/A	10.0738	0.0043618	0.000434691	PASS	missense_variant
1:118496729_A/G	15.5768	0.0074836	0.000483822	MISS02	splice_region_variant
1:119427371_G/A	16.5367	0.0029844	0.000180979	PASS	missense_variant
1:119427839_C/T	4.61076	0.0048232	0.00105004	PASS	missense_variant
1:119619068_G/A	17.0526	0.0022957	0.000134916	PASS	missense_variant
1:119923353_T/C	8.57199	0.0052825	0.000368177	PASS	splice_region_variant
1:119925589_A/C	18.9994	0.0022967	0.000121146	PASS	missense_variant
1:120050210_G/C	3.19988	0.004136	0.000449532	PASS	missense_variant
1:120054159_A/G	12.5208	0.0059743	0.000479789	MISS05	missense_variant
1:120166668_T/A	18.0102	0.0013838	7.69e-05	PASS	missense_variant
1:120269637_C/T	5.31904	0.0013774	0.00013486	PASS	missense_variant
1:120286529_G/A	15.3037	0.001607	0.000105165	PASS	missense_variant
1:120286620_C/A	4.96914	0.0066575	0.00112407	PASS	missense_variant
1:120293430_C/T	3.01411	0.009434	0.0031498	PASS	missense_variant
1:120302586_C/G	13.7695	0.002068	0.000150476	PASS	missense_variant
1:120311389_G/A	13.4036	0.0016077	0.000120124	PASS	missense_variant
1:120437688_A/T	12.6464	0.0052898	0.000420332	PASS	missense_variant
1:120437809_G/A	9.46078	0.009421	0.00100426	PASS	missense_variant
1:120458366_T/C	20.4636	0.0031056	0.000152212	PASS	missense_variant
1:120510113_G/T	11.13	0.012856	0.00116875	PASS	missense_variant
1:120539668_T/A	55.7377	0.0025346	4.56e-05	MISS02	missense_variant
1:120927147_C/G	13.9982	0.0027561	0.000150593	MISS05	missense_variant
1:120930173_G/A	5.11886	0.017027	0.00219265	MISS05	missense_variant
1:143767833_T/C	6.3266	0.0043618	0.000691979	MISS05	missense_variant
1:144854562_G/T	11.5163	0.0013787	0.000119868	MISS05	missense_variant
1:144877296_A/T	16.7798	0.015906	0.000962319	MISS05	splice_region_variant
1:144879114_A/C	9.4407	0.0018365	0.00019485	MISS05	missense_variant
1:144903113_G/A	14.1773	0.0027548	0.000194809	PASS	missense_variant
1:144904691_T/C	7.47078	0.0032184	0.000224786	VQSRTrancheSNP99.60to99.80EXAC	missense_variant
1:144930936_T/A	13.7709	0.0039062	0.000284687	PASS	missense_variant
1:145273415_A/G	23.0847	0.0027599	0.000119872	MISS05	missense_variant
1:145296448_T/A	3.24394	0.0363	0.0114783	MISS02	missense_variant
1:145296489_C/G	4.45346	0.0034467	0.000776012	MISS05	missense_variant
1:145303906_G/A	3.63602	0.1211	0.0127213	MISS02	splice_region_variant
1:145311946_A/G	164.34	0.0057471	3.52e-05	MISS05	missense_variant
1:145368518_C/T	42.8867	0.0041341	5.99e-05	MISS02	stop_gained
1:145438914_G/A	5.9896	0.0020661	0.000134852	PASS	missense_variant
1:145440446_G/A	9.86742	0.0020661	0.000209776	PASS	missense_variant
1:145440634_C/T	54.248	0.0016272	3e-05	PASS	splice_region_variant
1:145440991_G/A	9.52641	0.014233	0.00151333	PASS	missense_variant
1:145441167_CTG/C	8.68859	0.0029885	0.000344869	PASS	splice_region_variant
1:145508534_A/G	10.2294	0.0018365	0.000179829	PASS	missense_variant
1:145518140_T/C	15.3373	0.0011478	7.49e-05	PASS	missense_variant
1:145527676_C/T	8.63399	0.0020661	0.000239736	PASS	missense_variant
1:145534176_C/G	8.54436	0.0073462	0.00050944	PASS	missense_variant
1:145536012_G/A	3.39455	0.021369	0.00504945	PASS	missense_variant
1:145558910_G/A	9.17484	0.002068	0.000225815	PASS	missense_variant
1:145558911_C/T	14.6458	0.0025253	0.000135432	PASS	missense_variant
1:145561795_C/G	18.9821	0.0036917	0.000195166	PASS	missense_variant
1:145562532_C/G	3.29679	0.053441	0.0168368	MISS02	missense_variant
1:145579331_C/T	11.6252	0.0037055	0.000319829	MISS02	missense_variant
1:145585495_C/T	5.28724	0.0016241	0.000307579	PASS	missense_variant
1:145586596_C/T	25.2982	0.0041822	0.000165983	PASS	missense_variant
1:145586668_G/GCACTTTTA	20.6844	0.0055788	0.00027115	PASS	frameshift_variant
1:145608221_C/T	7.14248	0.0018484	0.000134941	PASS	missense_variant
1:145650509_T/C	12.785	0.0022957	0.000179942	PASS	missense_variant
1:146397444_A/G	3.62437	0.0016136	0.000445729	MISS02	missense_variant
1:146408085_G/C	10.2367	0.0051245	0.000502924	MISS02	missense_variant
1:146408086_A/G	5.02402	0.019785	0.00400149	MISS02	missense_variant
1:146465946_C/T	7.38993	0.0052711	0.000716547	MISS05	missense_variant
1:146634134_G/C	11.8086	0.0011558	6.07e-05	MISS02	missense_variant
1:146638152_C/T	17.3549	0.020211	0.00118718	PASS	missense_variant
1:146658604_C/T	5.59963	0.0064279	0.00115401	PASS	missense_variant
1:146672745_T/C	7.91876	0.046348	0.00609995	PASS	missense_variant
1:146736211_G/A	7.9985	0.0020709	0.000195166	PASS	missense_variant
1:146742648_G/A	17.0516	0.0022957	0.000134924	PASS	missense_variant
1:146747069_T/C	5.11671	0.0025253	0.000494545	PASS	splice_region_variant
1:146756016_GT/G	21.9116	0.0053706	0.000246366	PASS	splice_region_variant
1:147086354_A/G	11.8168	0.0022978	0.000194862	PASS	missense_variant
1:147092671_T/A	11.8411	0.0082759	0.000704246	PASS	missense_variant
1:147095762_C/T	20.315	0.012632	0.000629364	PASS	missense_variant
1:147095792_C/T	21.511	0.003214	0.000149871	PASS	missense_variant
1:147095958_G/C	6.38664	0.0012821	9.3e-05	MISS02	missense_variant
1:147126416_G/C	4.47304	0.001607	0.000359712	PASS	stop_gained
1:147131149_C/T	18.6314	0.0013993	7.52e-05	MISS02	missense_variant
1:148004660_G/C	18.6672	0.0014205	7.62e-05	MISS02	stop_gained
1:148251896_C/A	14.1463	0.0027548	0.000195236	MISS05	missense_variant
1:148252089_T/A	8.11897	0.0036731	0.000453872	MISS05	missense_variant
1:148252108_C/A	13.1424	0.013085	0.00100782	MISS05	missense_variant
1:148252826_T/C	8.41189	0.0010288	0.000122414	VQSRTrancheSNP99.60to99.80EXAC	missense_variant
1:148346613_G/A	16.2887	0.0029844	0.000183733	MISS05	missense_variant
1:148346738_G/T	15.6551	0.0075862	0.000488051	MISS05	missense_variant
1:149400149_G/C	37.0649	0.001159	3.13e-05	MISS02	missense_variant
1:149400428_GCTT/G	14.5686	0.010829	0.000750885	MISS02	missense_variant
1:149783634_G/A	18.4839	0.0011505	6.23e-05	VQSRTrancheSNP99.60to99.80EXAC	missense_variant
1:149784906_A/C	37.524	0.00115	3.07e-05	VQSRTrancheSNP99.80to99.90	missense_variant
1:149857908_T/C	14.4327	0.0050551	0.000351908	PASS	missense_variant
1:149871811_C/T	20.0152	0.015445	0.000763639	PASS	missense_variant
1:149943111_G/T	4.01763	0.0039027	0.00097425	PASS	missense_variant
1:150053494_C/T	8.4274	0.0050785	0.000569783	MISS02	missense_variant
1:150064123_C/A	14.4051	0.0034435	0.000239815	PASS	missense_variant
1:150082673_A/G	15.4112	0.0068902	0.000449991	PASS	missense_variant
1:150199007_GCTTCAT/G	12.6374	0.02135	0.00172331	PASS	inframe_insertion
1:150201478_C/T	5.22378	0.0039027	0.000749468	PASS	splice_acceptor_variant
1:150234692_T/C	7.10995	0.0013144	0.000185077	MISS02	missense_variant
1:150235791_C/T	11.9292	0.0016077	0.000134969	PASS	missense_variant
1:150471037_T/G	13.8659	0.0016667	0.000120388	MISS02	missense_variant
1:150526216_G/A	11.4625	0.006682	0.000586519	PASS	missense_variant
1:150526474_G/A	4.57932	0.029384	0.00258361	MISS02	missense_variant
1:150532229_C/T	11.2848	0.0032169	0.000285903	PASS	splice_region_variant
1:150532243_C/T	11.4678	0.0013774	0.000120261	PASS	missense_variant
1:150532602_C/T	18.4137	0.0027548	0.000149997	PASS	missense_variant
1:150550965_T/G	14.8134	0.0108	0.000736488	PASS	missense_variant
1:150551649_T/C	12.3212	0.016783	0.00138345	MISS02	missense_variant
1:150778652_T/C	8.8956	0.0032154	0.000362494	PASS	missense_variant
1:150785811_G/A	6.41608	0.0011633	0.000181488	MISS02	missense_variant
1:150789864_A/C	4.23993	0.042299	0.0103096	PASS	missense_variant
1:150789916_G/A	4.23693	0.042279	0.0103118	PASS	splice_region_variant
1:150899275_T/C	6.96588	0.0029858	0.000429731	PASS	missense_variant
1:150974738_A/G	11.5027	0.0013774	0.000119897	PASS	missense_variant
1:150974978_T/A	10.9519	0.0011478	0.000104913	PASS	missense_variant
1:151006520_G/A	4.65653	0.001607	0.000119883	PASS	missense_variant
1:151020534_A/G	20.8258	0.014936	0.000727532	PASS	missense_variant
1:151112570_G/C	15.6395	0.0013979	8.95e-05	PASS	splice_region_variant
1:151262945_C/G	21.3916	0.0057445	0.000270019	PASS	missense_variant
1:151263426_G/A	17.8986	0.0032199	0.000180446	PASS	missense_variant
1:151276012_C/A	10.6763	0.0045914	0.000299697	PASS	splice_region_variant
1:151288095_T/C	15.3703	0.0034435	0.00022476	PASS	missense_variant
1:151339230_C/T	5.55518	0.0029913	0.000539795	PASS	missense_variant
1:151339357_C/T	25.6509	0.0011542	4.5e-05	PASS	missense_variant
1:151340720_C/T	18.1361	0.0029844	0.000165021	PASS	missense_variant
1:151372653_G/A	21.109	0.0032169	0.000152863	PASS	missense_variant
1:151377922_T/C	51.2246	0.0022989	4.5e-05	PASS	missense_variant
1:151491026_C/T	4.5437	0.030702	0.00354697	PASS	missense_variant
1:151491176_G/T	23.0161	0.001378	6e-05	PASS	missense_variant
1:151497228_G/C	43.818	0.002094	4.79e-05	MISS02	missense_variant
1:151508290_A/G	15.8027	0.011024	0.00070488	PASS	missense_variant
1:151508720_A/G	10.9584	0.0034435	0.000315221	PASS	missense_variant
1:151508741_C/T	11.7971	0.0022957	0.000195008	PASS	stop_gained
1:151546880_C/T	14.3205	0.011075	0.000781414	PASS	splice_region_variant
1:151732657_C/G	3.61675	0.0043618	0.00035968	PASS	missense_variant
1:151735515_C/G	11.7713	0.0022957	0.000195436	PASS	missense_variant
1:151747243_CAG/C	5.32185	0.0018365	0.000209788	VQSRTrancheINDEL96.00to97.00	frameshift_variant
1:151774088_G/A	15.3542	0.0016092	0.000104963	PASS	missense_variant
1:151867651_T/C	17.6034	0.0016386	9.32e-05	MISS02	missense_variant
1:152058236_T/G	12.4935	0.0029871	0.000239751	PASS	missense_variant
1:152080012_C/G	17.3306	0.0029858	0.000164873	PASS	missense_variant
1:152080066_C/T	3.31488	0.0052971	0.00160391	PASS	missense_variant
1:152081254_CGGTGCAGCTGCTGTTCTTCCCTTTCCT/C	19.9729	0.0029871	0.000149984	VQSRTrancheINDEL99.00to99.50EXAC	inframe_deletion
1:152081677_C/A	12.4833	0.0029885	0.00024006	PASS	missense_variant
1:152082761_G/A	10.3922	0.012167	0.0011838	MISS05	missense_variant
1:152084027_TCTC/T	3.39092	0.0034722	0.000511186	MISS02	inframe_deletion
1:152127455_T/C	3.20049	0.35389	0.146129	PASS	missense_variant
1:152188041_C/T	10.0123	0.0012847	0.00012846	MISS02	missense_variant
1:152188088_T/C	15.2535	0.0085902	0.000567721	MISS02	missense_variant
1:152190915_C/T	7.67997	0.0029844	0.000389606	VQSRTrancheSNP99.60to99.80EXAC	missense_variant
1:152191082_C/G	3.13461	0.0048232	0.00154376	PASS	missense_variant
1:152191233_C/T	12.6552	0.003214	0.00025472	PASS	missense_variant
1:152191484_G/T	22.4928	0.0043638	0.000194821	PASS	missense_variant
1:152191518_G/C	13.3216	0.0022967	0.000134868	PASS	missense_variant
1:152191767_G/A	7.0774	0.0013774	0.00019485	PASS	stop_gained
1:152192882_C/T	6.92717	0.0029844	0.000419652	PASS	missense_variant
1:152193149_G/T	12.7114	0.0043638	0.000344683	PASS	missense_variant
1:152193150_A/T	12.7165	0.0043658	0.000344704	PASS	missense_variant
1:152193177_C/T	7.78416	0.0029844	0.000149862	PASS	missense_variant
1:152193243_A/T	7.13183	0.0029844	0.000419539	PASS	missense_variant
1:152193747_TCTC/T	30.6973	0.0013793	4.5e-05	VQSRTrancheINDEL99.00to99.50	inframe_deletion
1:152275688_G/A	4.45823	0.0094166	0.00212772	PASS	missense_variant
1:152275826_C/T	15.3779	0.0034451	0.000224753	PASS	missense_variant
1:152276186_G/A	17.2645	0.0064279	0.000374588	PASS	missense_variant
1:152276386_G/T	4.80799	0.0016226	0.000201832	VQSRTrancheSNP99.80to99.90EXAC	missense_variant
1:152276551_T/C	7.10355	0.0029885	0.000421788	PASS	missense_variant
1:152276873_C/G	11.0968	0.0029858	0.0002698	PASS	missense_variant
1:152277125_A/G	17.0521	0.0022957	0.00013492	PASS	missense_variant
1:152277371_T/C	17.8095	0.01057	0.000599484	VQSRTrancheSNP99.60to99.80EXAC	missense_variant
1:152277704_C/G	16.6197	0.0098714	0.00059952	VQSRTrancheSNP99.80to99.90EXAC	missense_variant
1:152277991_T/A	5.00846	0.0092155	0.000749258	MISS05	missense_variant
1:152278049_A/C	3.66962	0.080478	0.0206971	MISS02	missense_variant
1:152278534_G/T	14.6495	0.0023137	0.000158278	MISS05	missense_variant
1:152279452_C/A	4.94713	0.0024443	0.00049505	MISS02	missense_variant
1:152279896_C/A	3.89242	0.0029858	0.000419551	PASS	missense_variant
1:152280083_C/A	9.58234	0.0036748	0.000344621	PASS	missense_variant
1:152280337_C/G	23.4184	0.0045977	0.000197197	VQSRTrancheSNP99.60to99.80	missense_variant
1:152280514_C/G	14.2591	0.036731	0.00266707	VQSRTrancheSNP99.80to99.90EXAC	missense_variant
1:152281033_C/T	12.8084	0.0034435	0.000269703	PASS	missense_variant
1:152281158_A/T	4.47905	0.0052801	0.0011837	PASS	missense_variant
1:152281406_A/T	10.2269	0.0013774	0.000134852	PASS	missense_variant
1:152281630_C/T	15.3509	0.0020661	0.000134852	PASS	missense_variant
1:152281969_C/T	19.9226	0.0050505	0.000254727	PASS	missense_variant
1:152282120_G/T	15.3446	0.001607	0.000104885	PASS	missense_variant
1:152282597_G/A	9.60447	0.0022978	0.000239736	PASS	missense_variant
1:152282657_C/T	16.2189	0.0098714	0.000614324	PASS	missense_variant
1:152283083_C/T	17.8369	0.012414	0.000704225	PASS	missense_variant
1:152283472_G/T	3.89058	0.0029844	0.000419539	PASS	missense_variant
1:152283739_T/C	6.27851	0.0020661	0.000329647	PASS	missense_variant
1:152283922_T/C	3.12439	0.0092123	0.00296709	PASS	missense_variant
1:152284165_G/T	4.38973	0.0018391	0.000419551	PASS	missense_variant
1:152284208_T/C	5.77214	0.0029844	0.00050944	VQSRTrancheSNP99.80to99.90	missense_variant
1:152284306_G/A	9.03109	0.0022957	0.00025472	PASS	missense_variant
1:152284558_C/G	6.79708	0.027548	0.00415044	PASS	missense_variant
1:152284628_G/A	15.2906	0.029844	0.00200779	PASS	missense_variant
1:152284853_C/T	4.00099	0.0013774	0.000344621	PASS	missense_variant
1:152284996_C/T	8.24607	0.016559	0.00203776	PASS	missense_variant
1:152285314_C/T	5.89825	0.0011478	0.000194786	PASS	missense_variant
1:152285807_G/T	3.10535	0.0048232	0.00155829	PASS	missense_variant
1:152286496_G/T	38.4064	0.0022967	5.99e-05	PASS	missense_variant
1:152286804_G/GT	13.1392	0.0013799	0.000105156	PASS	missense_variant
1:152325851_G/T	7.98821	0.0020661	0.000224753	PASS	missense_variant
1:152326485_C/G	18.3392	0.0057392	0.000314654	PASS	missense_variant
1:152326869_A/G	12.8117	0.0022989	0.000179818	PASS	missense_variant
1:152327157_GTATT/G	3.78164	0.0036731	0.000973929	PASS	frameshift_variant
1:152382627_C/G	14.2662	0.0029844	0.000209776	PASS	missense_variant
1:152383244_A/G	15.9819	0.0013793	6.02e-05	PASS	missense_variant
1:152384568_G/A	3.24683	0.0016114	0.000496853	PASS	splice_region_variant
1:152484300_G/A	8.52098	0.0073767	0.000625802	MISS02	missense_variant
1:152487959_GCCT/G	5.85641	0.0033557	0.000574595	VQSRTrancheINDEL99.50to99.90EXAC	inframe_insertion
1:152659383_C/G	7.77095	0.0066728	0.000554606	PASS	missense_variant
1:152659417_T/C	7.6696	0.0013774	0.000179808	PASS	missense_variant
1:152659446_G/A	24.5569	0.0018365	7.49e-05	PASS	missense_variant
1:152671633_G/A	4.39085	0.0013793	6.11e-05	PASS	missense_variant
1:152732383_G/A	6.81062	0.0078053	0.00115373	PASS	missense_variant
1:152732461_G/A	8.38862	0.0032154	0.000284695	PASS	missense_variant
1:152733269_C/T	3.50304	0.0048276	0.00125918	PASS	missense_variant
1:152759989_G/A	3.95988	0.026654	0.00686784	PASS	missense_variant
1:153012641_G/A	22.3464	0.0066667	0.000300246	MISS05	missense_variant
1:153012711_A/G	5.22044	0.0041379	0.000795294	MISS05	missense_variant
1:153234344_C/G	10.982	0.0025689	0.000233288	MISS02	missense_variant
1:153270461_T/G	11.2689	0.0025287	0.000224915	PASS	missense_variant
1:153279576_C/T	5.36989	0.017939	0.00339015	PASS	missense_variant
1:153279702_G/A	13.9522	0.01745	0.00127129	MISS02	missense_variant
1:153303392_C/T	6.8229	0.014963	0.00222142	PASS	missense_variant
1:153615726_C/G	3.19659	0.0050946	0.000626608	MISS02	missense_variant
1:153636865_G/A	3.01565	0.019054	0.00639988	PASS	splice_region_variant
1:153655903_C/T	3.15869	0.0029858	0.000947197	PASS	missense_variant
1:153658297_G/A	3.12904	0.01034	0.00332794	PASS	missense_variant
1:153658681_T/C	6.72465	0.0018382	0.000273781	PASS	splice_region_variant
1:153744851_C/A	38.3373	0.0022978	6.01e-05	PASS	missense_variant
1:153744937_G/A	5.60189	0.0039062	0.000106016	PASS	missense_variant
1:153751927_G/A	4.00306	0.0027612	0.000570605	PASS	missense_variant
1:153752449_G/A	5.18086	0.0064695	0.00125529	PASS	missense_variant
1:153791328_C/T	18.7708	0.0025253	0.000134856	PASS	missense_variant
1:153904889_C/A	18.9378	0.0013966	7.38e-05	MISS02	missense_variant
1:153932756_C/T	15.1631	0.0022978	0.000151865	PASS	missense_variant
1:153932932_C/T	16.4676	0.014325	0.000881754	PASS	missense_variant
1:153941536_C/T	3.27005	0.0098805	0.00304238	PASS	missense_variant
1:153973445_T/C	11.9813	0.0020661	0.000104888	PASS	missense_variant
1:153994596_A/G	17.4075	0.0082835	0.000479602	PASS	splice_region_variant
1:153998176_C/T	6.83442	0.0080423	0.00118487	PASS	missense_variant
1:154000049_A/T	11.5378	0.0029871	0.000225023	PASS	missense_variant
1:154026699_A/G	13.2931	0.0043718	0.000330211	PASS	splice_region_variant
1:154215747_G/A	10.2202	0.0013774	0.000134941	PASS	missense_variant
1:154247647_T/C	9.57717	0.0011484	0.000120034	PASS	missense_variant
1:154247918_C/T	7.67152	0.001607	0.000209769	PASS	missense_variant
1:154303963_A/G	16.2041	0.010101	0.000629327	PASS	missense_variant
1:154516863_A/G	6.29568	0.0023974	0.00038157	MISS02	missense_variant
1:154519909_T/C	10.4187	0.0052825	0.000509455	PASS	missense_variant
1:154680507_A/G	16.1653	0.0050808	0.000315808	PASS	missense_variant
1:154680585_AGCT/A	5.9533	0.0046211	0.000526237	PASS	inframe_deletion
1:154918522_C/T	15.2043	0.011949	0.00079477	PASS	missense_variant
1:154920755_T/G	11.4948	0.010552	0.000903361	MISS02	missense_variant
1:154920765_G/A	10.7161	0.0051595	0.000483734	MISS02	missense_variant
1:154941239_C/A	26.8524	0.0016077	6e-05	PASS	splice_region_variant
1:154962102_G/A	12.6202	0.010214	0.000817018	MISS02	missense_variant
1:154989039_C/G	10.7029	0.00115	0.00010756	PASS	missense_variant
1:154997012_G/A	15.2993	0.0011484	7.51e-05	PASS	stop_gained
1:154999134_C/T	3.39997	0.0013774	0.000405515	PASS	missense_variant
1:155002598_G/C	17.4551	0.0018374	0.000105447	PASS	missense_variant
1:155002921_G/A	4.16808	0.0018391	0.000245421	PASS	missense_variant
1:155003017_C/T	12.0042	0.0025253	0.000210856	PASS	missense_variant
1:155005584_T/C	5.86374	0.0066667	0.00114326	MISS05	missense_variant
1:155013903_C/T	4.12839	0.0011484	0.000278414	PASS	missense_variant
1:155013964_C/T	13.338	0.0045956	0.000167163	PASS	missense_variant
1:155015886_AGGTGCGGGACTACGT/A	8.9413	0.0080571	0.000907606	VQSRTrancheINDEL99.00to99.50EXAC	inframe_deletion
1:155020263_C/T	9.71838	0.0016092	0.000165822	PASS	missense_variant
1:155026947_C/G	8.65864	0.0026699	0.000309081	MISS02	missense_variant
1:155058887_A/C	15.37	0.0055249	0.000361326	PASS	splice_acceptor_variant
1:155058957_C/T	10.6842	0.0045956	0.000359842	PASS	missense_variant
1:155059015_C/T	17.3429	0.0020804	0.000120192	PASS	missense_variant
1:155106439_G/A	5.81882	0.0039062	0.000673483	PASS	missense_variant
1:155106446_G/A	6.63188	0.0064338	0.000975461	PASS	missense_variant
1:155110127_C/T	10.057	0.0039045	0.000389606	PASS	missense_variant
1:155148359_C/T	15.1783	0.0018888	0.000124661	MISS02	splice_region_variant
1:155148462_C/T	13.4933	0.0034868	0.000180685	PASS	missense_variant
1:155152205_C/T	3.25504	0.0016077	0.000135968	PASS	missense_variant
1:155156267_C/G	21.8456	0.0027586	0.00012661	PASS	splice_region_variant
1:155161781_C/T	7.18974	0.0031483	0.000439078	PASS	missense_variant
1:155166925_C/T	18.6099	0.0039027	0.000210488	PASS	missense_variant
1:155167949_C/G	11.9188	0.0016077	0.000135086	PASS	missense_variant
1:155171288_T/G	12.7012	0.0072539	0.000574963	MISS02	missense_variant
1:155173068_T/C	8.78592	0.0022957	0.000166991	PASS	splice_region_variant
1:155176089_C/T	10.1972	0.0018365	0.000180397	PASS	missense_variant
1:155181999_C/A	3.47602	0.0021167	0.000473644	PASS	stop_gained
1:155205634_T/C	8.38465	0.029642	0.00363004	PASS	missense_variant
1:155206036_C/T	3.4287	0.0016099	0.000470072	PASS	splice_region_variant
1:155224595_CG/C	5.99659	0.0092155	0.00154868	MISS02	frameshift_variant
1:155226457_G/A	4.29153	0.013122	0.00308873	PASS	splice_region_variant
1:155240609_G/A	18.3936	0.0055122	0.00030125	PASS	missense_variant
1:155254411_G/T	14.642	0.0045935	0.000315069	PASS	missense_variant
1:155255673_G/A	15.0641	0.0092081	0.00061656	PASS	missense_variant
1:155263248_G/A	10.7392	0.001607	0.000149858	PASS	missense_variant
1:155264507_C/T	9.15803	0.0011494	0.000125636	MISS02	missense_variant
1:155270051_G/A	6.79965	0.0018868	0.000277932	PASS	missense_variant
1:155271095_G/A	6.32517	0.0032154	0.00050973	PASS	missense_variant
1:155289424_A/C	3.10114	0.001607	0.000434613	PASS	missense_variant
1:155317682_C/T	10.7978	0.034483	0.00329667	PASS	missense_variant
1:155408472_T/G	20.472	0.0018374	8.99e-05	PASS	missense_variant
1:155408493_G/A	15.3556	0.0025253	0.000164843	PASS	missense_variant
1:155451810_G/A	11.166	0.0018374	0.000164829	PASS	missense_variant
1:155452170_C/T	17.8776	0.017923	0.0010198	PASS	missense_variant
1:155582270_C/T	17.4735	0.0018374	0.000105336	PASS	missense_variant
1:155629614_C/T	5.41359	0.0013774	0.00025472	PASS	missense_variant
1:155630248_C/T	6.0099	0.002068	0.000344693	PASS	missense_variant
1:155697501_A/G	10.7401	0.001607	0.000149844	PASS	missense_variant
1:155698917_T/G	12.2145	0.0052825	0.000434587	PASS	splice_region_variant
1:155721911_C/T	3.34025	0.013819	0.00417756	MISS05	missense_variant
1:155722364_T/C	5.48856	0.0013521	0.000246621	MISS02	missense_variant
1:155734873_T/A	17.955	0.0048209	0.000269728	PASS	missense_variant
1:155736385_T/C	11.5183	0.0020671	0.000179802	PASS	missense_variant
1:155746245_G/C	3.02189	0.017455	0.00584445	PASS	missense_variant
1:155792250_CTTCA/C	21.4532	0.0016077	7.51e-05	VQSRTrancheINDEL97.00to99.00EXAC	frameshift_variant
1:155837932_A/C	16.6078	0.010106	0.000614343	PASS	missense_variant
1:155838284_A/G	16.8803	0.0025253	0.000149957	PASS	missense_variant
1:155896516_A/T	30.7375	0.0052825	0.000149835	PASS	missense_variant
1:155911589_C/T	5.23015	0.0096419	0.00185801	PASS	missense_variant
1:155911730_A/G	13.5065	0.0064397	0.000479645	PASS	missense_variant
1:156035782_C/T	19.3221	0.011484	0.000600889	PASS	inframe_insertion
1:156046736_C/T	12.1158	0.0014918	0.000123297	MISS02	missense_variant
1:156108511_G/A	10.2595	0.0032169	0.000172522	PASS	missense_variant
1:156124485_T/A	11.5058	0.0045685	0.000398724	PASS	missense_variant
1:156144971_G/A	12.8169	0.0036832	0.000239866	PASS	missense_variant
1:156212605_C/G	14.628	0.0033816	0.000231904	MISS02	stop_gained
1:156214492_T/C	14.3242	0.010162	0.000716199	PASS	missense_variant
1:156215431_G/A	16.3766	0.0032288	0.000197759	MISS02	missense_variant
1:156215597_C/T	15.8377	0.0076263	0.000484994	MISS02	missense_variant
1:156233366_G/A	15.5936	0.033427	0.00221287	PASS	splice_region_variant
1:156255609_C/G	12.6918	0.0036782	0.000290796	PASS	missense_variant
1:156280881_C/A	6.29575	0.0057418	0.000916439	PASS	missense_variant
1:156294760_T/TAC	16.8912	0.0025276	0.000149997	PASS	splice_region_variant
1:156314421_T/G	5.10224	0.0016077	0.000315505	PASS	missense_variant
1:156347132_C/A	18.4203	0.0013787	7.49e-05	PASS	missense_variant
1:156348148_C/T	6.06129	0.0062645	0.000955646	PASS	missense_variant
1:156351659_G/A	18.9546	0.0017015	8.99e-05	MISS02	missense_variant
1:156354577_C/T	17.4895	0.0016085	9.21e-05	PASS	stop_gained
1:156506972_C/T	13.1198	0.0039609	0.000303012	PASS	splice_donor_variant
1:156508667_T/C	5.47199	0.0022967	0.000420509	PASS	missense_variant
1:156521565_C/A	5.85431	0.0025264	0.000135192	PASS	missense_variant
1:156533080_T/C	8.97949	0.0016386	0.000182749	MISS05	missense_variant
1:156533603_G/A	12.8908	0.0016144	0.000125423	PASS	missense_variant
1:156552846_A/C	18.7835	0.001151	6.13e-05	PASS	missense_variant
1:156552969_G/A	6.18475	0.02	0.00204262	PASS	splice_region_variant
1:156554700_G/A	9.79162	0.0012154	0.000124262	MISS02	missense_variant
1:156555792_C/T	6.21754	0.0034483	0.000556218	MISS02	missense_variant
1:156562159_A/G	3.83964	0.0016092	0.000419601	PASS	splice_region_variant
1:156563805_G/A	11.121	0.0094166	0.000854061	PASS	missense_variant
1:156563834_G/A	14.6333	0.0115	0.000794388	PASS	missense_variant
1:156565010_G/A	13.7399	0.0039098	0.000285594	PASS	stop_gained
1:156593775_G/A	9.65078	0.0019249	9.12e-05	MISS02	missense_variant
1:156617372_C/G	9.78764	0.0069156	0.000710979	PASS	missense_variant
1:156621311_G/A	19.3328	0.0089573	0.00046729	PASS	missense_variant
1:156621488_C/T	3.71062	0.014925	0.00406657	MISS02	splice_region_variant
1:156622705_A/G	17.7595	0.020891	0.00119999	PASS	missense_variant
1:156626789_T/C	10.8762	0.0011484	0.000105699	PASS	missense_variant
1:156628379_G/A	15.1859	0.0011489	7.57e-05	PASS	missense_variant
1:156628909_C/A	3.88545	0.0077675	0.00201072	PASS	missense_variant
1:156640294_A/G	3.5531	0.0012697	0.000357676	MISS02	missense_variant
1:156640916_G/T	15.3113	0.0013799	9.02e-05	PASS	missense_variant
1:156641477_C/T	5.9116	0.0022999	0.000389793	PASS	missense_variant
1:156708234_T/C	14.0215	0.006682	0.00047953	PASS	splice_region_variant
1:156713997_GTTC/G	33.7905	0.0025253	7.49e-05	PASS	inframe_deletion
1:156752120_A/C	7.6917	0.0036799	0.000479962	PASS	missense_variant
1:156756905_A/G	8.47074	0.0011526	0.000136207	PASS	missense_variant
1:156837976_T/C	9.74618	0.0025253	0.000180397	PASS	missense_variant
1:156838037_C/G	19.8152	0.0057471	0.000291626	PASS	missense_variant
1:156838353_G/A	5.36409	0.0018727	0.00034965	PASS	missense_variant
1:156843654_G/A	3.31381	0.0012382	5.87e-05	MISS02	missense_variant
1:156844184_C/T	5.32369	0.0018365	7.49e-05	PASS	missense_variant
1:156845384_T/TGTC	19.1489	0.0011478	6e-05	PASS	inframe_insertion
1:156876492_C/T	3.82468	0.0080386	0.00211432	PASS	missense_variant
1:156879633_T/C	18.9308	0.009876	0.000526617	PASS	missense_variant
1:156882035_G/T	9.0189	0.0016509	0.000183318	MISS02	splice_region_variant
1:156901702_T/C	6.39307	0.03556	0.00573429	MISS02	splice_region_variant
1:156907096_A/G	11.3706	0.010815	0.000960615	PASS	missense_variant
1:156908225_C/T	3.46359	0.003214	0.000930065	PASS	missense_variant
1:156911714_C/T	16.0572	0.0052947	0.000331385	PASS	missense_variant
1:156933019_G/C	5.78617	0.0068966	0.00119875	PASS	missense_variant
1:156941578_C/T	14.263	0.0057471	0.000405101	PASS	missense_variant
1:157062485_TG/T	17.7285	0.0053315	0.000302252	PASS	frameshift_variant
1:157067719_G/C	5.1706	0.0066697	0.00121794	PASS	missense_variant
1:157485511_G/A	9.38486	0.0025264	0.000269808	PASS	missense_variant
1:157514207_C/T	16.0012	0.0061983	0.00038963	PASS	missense_variant
1:157517171_G/T	14.6395	0.0046533	0.000319244	MISS02	missense_variant
1:157545483_A/G	5.57979	0.018851	0.00343153	PASS	splice_region_variant
1:157556080_C/G	15.326	0.0011484	7.5e-05	PASS	missense_variant
1:157557269_T/C	19.0944	0.0059743	0.000314663	PASS	missense_variant
1:157660155_C/T	10.9606	0.0011484	0.000104885	PASS	missense_variant
1:157660251_A/G	9.45223	0.0029844	0.00031658	PASS	missense_variant
1:157739773_G/A	3.82851	0.0087236	0.00229337	PASS	missense_variant
1:157745566_T/C	5.95027	0.0020661	0.000240877	PASS	splice_region_variant
1:157768030_G/C	10.2089	0.010684	0.00105673	MISS02	missense_variant
1:157771827_G/T	19.161	0.0011478	6e-05	PASS	missense_variant
1:158063165_T/C	19.7328	0.0020661	0.00010491	PASS	missense_variant
1:158152910_A/G	16.5602	0.01165	0.000711281	PASS	missense_variant
1:158226022_G/A	4.6039	0.0013787	0.000299787	PASS	missense_variant
1:158226617_C/T	15.3118	0.0013787	9.02e-05	PASS	missense_variant
1:158226689_G/A	13.1546	0.001378	0.000104888	PASS	missense_variant
1:158227297_C/T	13.2671	0.013545	0.00103389	PASS	missense_variant
1:158261128_G/A	6.1953	0.001607	0.00014984	PASS	missense_variant
1:158262086_A/G	76.6773	0.0011478	1.5e-05	PASS	missense_variant
1:158368632_T/C	11.5219	0.0034483	0.000300228	PASS	missense_variant
1:158389837_T/G	16.5276	0.0032154	0.000195137	PASS	missense_variant
1:158390397_G/A	12.7782	0.0011478	8.99e-05	PASS	missense_variant
1:158517401_C/CATCTT	27.9249	0.0025322	9.09e-05	PASS	frameshift_variant
1:158549510_G/C	11.9313	0.0016077	0.000134945	PASS	missense_variant
1:158576919_G/A	17.7153	0.021589	0.00124401	PASS	missense_variant
1:158592989_AAGATCAGGAG/A	3.2189	0.013315	0.00417483	VQSRTrancheINDEL96.00to97.00	splice_region_variant
1:158605757_C/T	6.90983	0.014017	0.00205317	PASS	missense_variant
1:158617383_C/T	12.0628	0.0025253	0.000209832	PASS	missense_variant
1:158623056_G/C	19.4477	0.0089573	0.000464531	PASS	splice_region_variant
1:158627400_C/T	6.39581	0.0011489	0.000179808	PASS	missense_variant
1:158627464_C/T	9.85496	0.012638	0.0011241	PASS	missense_variant
1:158636152_C/T	15.2952	0.0011484	7.52e-05	PASS	missense_variant
1:158647473_G/A	5.94716	0.0013819	0.00023263	PASS	splice_region_variant
1:158647583_G/A	18.3954	0.0013787	7.5e-05	PASS	missense_variant
1:158647631_T/A	3.29388	0.99885	0.996222	PASS	splice_region_variant
1:158651396_C/T	11.3623	0.0039027	0.000344704	PASS	missense_variant
1:158669974_G/A	14.2111	0.012685	0.000903261	PASS	missense_variant
1:158670031_TG/T	8.97383	0.0032288	0.000360837	PASS	frameshift_variant
1:158687511_T/C	18.4303	0.0013799	7.5e-05	PASS	missense_variant
1:158724650_T/A	3.98268	0.010383	0.00262747	PASS	missense_variant
1:158736388_G/A	9.67665	0.012167	0.00127122	PASS	missense_variant
1:158747239_C/T	25.4743	0.0011494	4.52e-05	PASS	missense_variant
1:158819011_C/T	13.0799	0.025818	0.00202208	PASS	missense_variant
1:158908951_G/A	21.1026	0.0025264	0.000120008	PASS	missense_variant
1:158908970_C/T	16.6923	0.023031	0.00141027	PASS	missense_variant
1:158913582_A/G	5.8993	0.017143	0.00294791	MISS02	splice_region_variant
1:159015238_G/A	6.09174	0.0019493	0.000320513	MISS02	missense_variant
1:159021699_A/G	30.7668	0.0041341	0.000134908	PASS	missense_variant
1:159277673_G/C	11.7725	0.0052849	0.000451101	PASS	missense_variant
1:159277709_C/T	14.5515	0.030253	0.0021393	MISS02	missense_variant
1:159284066_G/T	19.1785	0.0011484	5.99e-05	PASS	stop_gained
1:159409669_G/A	14.1502	0.0075792	0.000539423	PASS	missense_variant
1:159409688_T/C	23.0122	0.0013774	5.99e-05	PASS	missense_variant
1:159505743_T/C	25.4574	0.0011558	4.55e-05	PASS	missense_variant
1:159752016_G/A	11.5175	0.0027548	0.000239787	PASS	missense_variant
1:159778115_C/T	15.4641	0.010106	0.000659749	PASS	missense_variant
1:159799808_C/T	4.50941	0.0011484	0.000254895	PASS	stop_gained
1:159805006_G/A	15.3469	0.0027561	0.00018005	PASS	missense_variant
1:159824820_T/C	23.3363	0.0018538	7.96e-05	PASS	splice_region_variant
1:159827606_G/A	19.256	0.019301	0.00102102	PASS	missense_variant
1:159842773_C/A	9.04771	0.0045914	0.000509547	PASS	missense_variant
1:159850456_A/G	16.1237	0.011478	0.000719619	PASS	missense_variant
1:159856307_C/A	15.3884	0.0018425	0.00011994	PASS	missense_variant
1:159890301_C/A	20.5837	0.0078161	0.000382567	PASS	missense_variant
1:159899469_C/G	9.88976	0.012305	0.00125813	PASS	missense_variant
1:159906278_C/T	18.5714	0.014509	0.000792127	PASS	missense_variant
1:159923141_A/G	5.10818	0.0048343	0.000449816	PASS	missense_variant
1:160012175_G/A	5.65733	0.0016107	0.000285088	PASS	missense_variant
1:160063587_C/T	18.5166	0.0087477	0.000476366	PASS	missense_variant
1:160063763_G/A	15.3351	0.0018374	0.000120023	PASS	missense_variant
1:160063880_G/A	7.94931	0.0062155	0.000335611	PASS	missense_variant
1:160063886_C/T	3.67929	0.0016107	0.000122699	PASS	missense_variant
1:160093165_G/A	5.78007	0.006204	0.00107888	PASS	missense_variant
1:160098645_T/G	10.7612	0.0011484	0.000106828	PASS	splice_region_variant
1:160098882_AG/A	9.33327	0.001151	0.000123449	VQSRTrancheINDEL99.50to99.90EXAC	splice_region_variant
1:160106164_C/T	16.4494	0.0071199	0.000435749	PASS	splice_region_variant
1:160129232_C/G	10.0199	0.0034467	0.000345055	PASS	missense_variant
1:160134114_C/T	18.0102	0.029385	0.00167815	PASS	missense_variant
1:160151805_C/T	18.7674	0.0025253	0.00013488	PASS	stop_gained
1:160164827_T/C	11.1566	0.0055351	0.00049864	PASS	missense_variant
1:160251964_C/T	3.29039	0.002068	0.000629402	PASS	missense_variant
1:160254899_C/T	4.4576	0.0080349	0.00181382	PASS	missense_variant
1:160261619_C/A	8.36934	0.0013787	0.000164932	PASS	missense_variant
1:160267498_T/A	7.61978	0.0011505	0.00015114	PASS	missense_variant
1:160312927_C/T	13.1656	0.0027548	0.000209776	PASS	missense_variant
1:160323927_C/T	9.75453	0.001607	0.000164982	PASS	missense_variant
1:160325722_G/A	15.4175	0.0073496	0.000480005	PASS	missense_variant
1:160328035_C/T	9.79018	0.0050505	0.000209769	PASS	missense_variant
1:160340673_G/C	14.9095	0.008672	0.000586387	PASS	missense_variant
1:160390242_A/G	15.1762	0.010805	0.00071923	PASS	missense_variant
1:160604685_G/C	20.838	0.0028423	0.00013677	PASS	missense_variant
1:160607318_A/G	3.33381	0.0027804	0.000835627	MISS05	splice_region_variant
1:160718155_G/T	14.09	0.0073462	0.000524958	PASS	missense_variant
1:160721161_G/A	4.42256	0.0094123	0.00214386	PASS	missense_variant
1:160721162_A/G	4.42473	0.0094166	0.0021438	PASS	missense_variant
1:160811231_C/G	15.4019	0.0032214	0.000209788	PASS	missense_variant
1:160851860_C/T	13.4444	0.0016092	0.000119872	PASS	missense_variant
1:160922421_T/G	3.67391	0.0066636	0.00139573	PASS	missense_variant
1:161012652_G/A	15.9682	0.0013774	4.5e-05	PASS	missense_variant
1:161018955_A/G	14.9002	0.0066575	0.0004496	PASS	missense_variant
1:161019057_G/A	3.34649	0.0027586	0.000825925	PASS	missense_variant
1:161019224_A/C	14.0859	0.0021429	0.000152434	PASS	missense_variant
1:161021479_T/C	11.32	0.0070192	0.000624064	MISS02	missense_variant
1:161069587_G/C	3.48472	0.0029871	0.000859029	PASS	splice_donor_variant
1:161088936_G/A	16.7677	0.0057524	0.000344931	PASS	start_lost
1:161123804_C/T	5.28948	0.0022957	0.000434822	PASS	missense_variant
1:161130638_C/T	19.4749	0.0043678	0.000225212	PASS	missense_variant
1:161138777_C/T	6.9905	0.012638	0.000988353	PASS	splice_region_variant
1:161140563_A/G	20.476	0.0018382	8.99e-05	PASS	splice_region_variant
1:161143842_G/A	15.3081	0.0013986	9.15e-05	PASS	splice_region_variant
1:161165263_T/C	14.7769	0.008747	0.000596805	MISS02	missense_variant
1:161166059_C/T	19.089	0.00115	6.03e-05	PASS	missense_variant
1:161166610_C/T	20.0158	0.0080944	0.000407535	MISS05	missense_variant
1:161168167_C/T	12.8701	0.0013947	7.26e-05	MISS02	missense_variant
1:161183721_C/A	32.0265	0.0062012	0.000194797	PASS	missense_variant
1:161193212_C/T	10.1403	0.0025749	0.000226785	PASS	missense_variant
1:161199705_G/A	8.94569	0.0016077	0.000179975	PASS	missense_variant
1:161200599_G/A	15.3868	0.0055096	0.000359928	PASS	splice_region_variant
1:161200715_G/A	20.4912	0.0018416	9e-05	PASS	missense_variant
1:161336289_A/G	4.09709	0.014692	0.00362623	PASS	splice_region_variant
1:161495037_G/A	7.62607	0.0018365	0.000241204	PASS	missense_variant
1:161495469_G/A	16.8846	0.0022999	0.000136508	PASS	missense_variant
1:161495470_G/A	8.67743	0.0018399	0.000212379	PASS	missense_variant
1:161495823_G/A	13.2181	0.0027688	0.000210008	PASS	missense_variant
1:161514553_C/A	4.43794	0.0011489	0.000149898	MISS05	missense_variant
1:161518292_T/C	10.7408	0.001607	0.000149835	MISS05	missense_variant
1:161599831_G/T	7.22236	0.0051095	0.000710584	PASS	splice_region_variant
1:161643278_A/C	8.64081	0.001913	0.000221766	MISS02	missense_variant
1:161681040_G/A	26.7232	0.0016085	6.03e-05	PASS	missense_variant
1:161681082_C/T	5.25979	0.0027574	0.000525415	PASS	missense_variant
1:161681124_G/C	6.77452	0.0034451	0.000510036	PASS	missense_variant
1:161681869_A/G	9.53609	0.0018365	0.000150069	PASS	missense_variant
1:161719821_G/A	23.1614	0.0073529	0.000319713	PASS	missense_variant
1:161748088_T/C	15.2503	0.0011489	7.54e-05	PASS	missense_variant
1:161790939_A/G	15.4386	0.0013876	9e-05	MISS02	missense_variant
1:161928391_G/A	8.52284	0.0022999	0.0002704	PASS	missense_variant
1:161953691_C/T	10.9549	0.0011478	0.000104885	PASS	missense_variant
1:161953763_T/C	7.67179	0.001378	0.000179835	PASS	missense_variant
1:161976203_G/A	6.72424	0.0016122	0.000240089	PASS	stop_gained
1:161987291_T/C	17.42	0.015214	0.000886072	PASS	missense_variant
1:162343861_C/T	8.44154	0.01934	0.00233079	MISS02	missense_variant
1:162343980_T/C	14.4861	0.0036799	0.000254903	PASS	missense_variant
1:162467864_T/G	4.64882	0.0024728	0.000532954	MISS02	missense_variant
1:163044183_G/A	15.3526	0.0022957	0.000149853	PASS	missense_variant
1:163122448_C/G	13.4597	0.011982	0.000900198	PASS	missense_variant
1:165513540_C/A	19.7267	0.0020804	0.00010567	PASS	missense_variant
1:165638256_G/A	11.803	0.01479	0.00127026	MISS05	splice_region_variant
1:165638635_A/C	15.3843	0.005977	0.000390695	PASS	missense_variant
1:165652283_C/T	13.6639	0.0036731	0.000269736	PASS	missense_variant
1:165667770_G/C	6.58329	0.014153	0.00217596	MISS02	missense_variant
1:166963277_G/A	14.0003	0.0036748	0.000263378	PASS	missense_variant
1:167024212_C/A	9.19868	0.0013787	0.000150065	PASS	splice_donor_variant
1:167038224_C/T	13.4631	0.0048254	0.000360025	PASS	missense_variant
1:167088637_G/A	5.31628	0.0013774	4.5e-05	PASS	missense_variant
1:167095042_G/A	13.7697	0.0019011	0.000138308	MISS02	missense_variant
1:167097240_T/G	17.0687	0.0022989	0.000134977	PASS	missense_variant
1:167343453_G/A	12.9366	0.0013793	0.000106756	PASS	missense_variant
1:167384979_T/C	5.15624	0.0062069	0.000959664	PASS	missense_variant
1:167385030_G/A	10.8472	0.0011563	0.000106711	PASS	missense_variant
1:167666340_G/A	8.77913	0.0018553	0.000211679	PASS	missense_variant
1:167787408_C/T	11.9333	0.001607	0.000134864	PASS	missense_variant
1:167793969_A/G	13.3034	0.0011478	5.99e-05	PASS	missense_variant
1:167825463_T/C	18.4242	0.0013787	7.49e-05	PASS	missense_variant
1:168065738_C/G	7.58346	0.0018553	0.000245045	PASS	splice_region_variant
1:168282040_C/T	20.4661	0.0027548	0.000134957	PASS	missense_variant
1:169102044_G/GAAGT	4.9855	0.0029858	0.00060033	PASS	frameshift_variant
1:169256555_T/C	9.57015	0.0011478	0.000120059	PASS	missense_variant
1:169346256_T/TA	4.01563	0.014271	0.00359236	MISS05	frameshift_variant
1:169435095_T/C	13.4582	0.0048254	0.000360155	PASS	missense_variant
1:169492560_C/G	12.6369	0.0032154	0.000255202	PASS	missense_variant
1:169497306_G/A	11.7959	0.01931	0.00166647	PASS	missense_variant
1:169499000_T/C	3.55912	0.0050505	0.0014242	PASS	missense_variant
1:169509995_T/C	4.42061	0.0022999	4.5e-05	PASS	missense_variant
1:169511464_C/A	8.04357	0.0025264	0.000314786	PASS	missense_variant
1:169529941_C/T	7.67777	0.0016085	0.000209794	PASS	missense_variant
1:169555489_G/C	14.3323	0.0013774	6.01e-05	PASS	missense_variant
1:169578738_G/A	19.5636	0.0020872	0.0001069	PASS	splice_region_variant
1:169701851_T/C	22.9923	0.0013825	6.02e-05	PASS	missense_variant
1:169761910_G/C	10.7941	0.012679	0.00118829	PASS	missense_variant
1:169762052_T/G	56.3033	0.0025264	4.5e-05	PASS	missense_variant
1:169821055_A/C	14.0131	0.02848	0.00208759	PASS	missense_variant
1:169953815_A/C	3.58394	0.0083565	0.00234578	PASS	missense_variant
1:170501388_C/G	19.2078	0.0022978	0.00011989	PASS	missense_variant
1:170521445_G/A	11.5041	0.0013774	0.000119883	PASS	missense_variant
1:170633463_C/G	16.3358	0.002068	0.000126839	PASS	missense_variant
1:170688868_T/C	16.1176	0.0016174	9.26e-05	PASS	splice_region_variant
1:170705189_C/A	10.4363	0.0043618	0.000419601	PASS	splice_region_variant
1:170705313_C/T	6.57138	0.0013774	0.000209851	PASS	missense_variant
1:170934403_C/T	3.12362	0.0073835	0.00237569	PASS	splice_region_variant
1:170941013_G/A	13.1433	0.0066605	0.000509898	PASS	missense_variant
1:170961421_C/T	22.9878	0.001378	6e-05	PASS	missense_variant
1:170964651_C/T	28.9866	0.0039027	0.000135147	PASS	missense_variant
1:171076823_T/C	13.758	0.0041322	0.000301505	PASS	missense_variant
1:171083248_C/T	6.18768	0.0016092	0.000120059	PASS	missense_variant
1:171085368_A/G	11.5054	0.0027561	0.000240154	PASS	missense_variant
1:171162476_G/A	16.9572	0.0065882	0.000390942	MISS02	splice_region_variant
1:171174434_C/T	4.80037	0.0013857	0.000288982	PASS	missense_variant
1:171178002_G/C	4.36395	0.018595	0.00137877	PASS	missense_variant
1:171254471_G/A	7.76492	0.029169	0.00385446	PASS	missense_variant
1:171289076_G/C	19.7421	0.002068	0.000104957	PASS	missense_variant
1:171301885_G/C	15.3394	0.0020661	0.000134953	PASS	missense_variant
1:171303797_A/T	15.3341	0.0011489	7.5e-05	PASS	missense_variant
1:171492641_C/G	11.6756	0.0092039	0.000794992	PASS	missense_variant
1:171501603_C/G	9.56183	0.021719	0.00231648	PASS	missense_variant
1:171530250_T/C	21.2298	0.0075792	0.000359604	PASS	splice_region_variant
1:171621312_C/T	23.4742	0.012167	0.000524423	PASS	missense_variant
1:171675563_A/C	30.8051	0.0018484	6.01e-05	MISS02	splice_region_variant
1:171755180_A/T	15.1329	0.0046104	0.000305979	PASS	missense_variant
1:171763662_C/A	6.13633	0.0013793	0.000225036	PASS	missense_variant
1:172558279_C/A	10.9735	0.0011531	0.00010519	PASS	missense_variant
1:172633495_A/T	24.4808	0.0018399	7.53e-05	PASS	stop_gained
1:173010538_ATG/A	16.8707	0.022076	0.00133629	PASS	frameshift_variant
1:173475997_G/C	16.0892	0.0043799	0.000273349	PASS	missense_variant
1:173685184_T/C	13.1489	0.0013774	0.000104888	PASS	start_lost
1:173703412_A/G	13.7962	0.0020661	0.000150047	PASS	missense_variant
1:173772330_C/G	3.48316	0.0027612	0.000794293	PASS	missense_variant
1:173776602_A/G	15.2626	0.0013876	9.1e-05	MISS05	missense_variant
1:173800770_T/C	6.7944	0.0027548	0.000406406	PASS	splice_donor_variant
1:173916689_C/T	4.05306	0.017004	0.000979034	PASS	missense_variant
1:174200278_T/G	52.5638	0.0032318	6.17e-05	PASS	splice_region_variant
1:174418031_G/A	3.06902	0.0011489	0.000374644	PASS	missense_variant
1:174418267_A/G	19.2237	0.0023127	0.000120569	PASS	missense_variant
1:174846534_G/A	3.30196	0.012858	0.00392927	PASS	missense_variant
1:175046886_G/A	10.2841	0.0029844	0.000270742	PASS	missense_variant
1:175063348_G/A	19.8115	0.004157	0.000210659	PASS	missense_variant
1:175067481_CA/C	10.7312	0.0016085	0.00015011	PASS	frameshift_variant
1:175097264_C/T	10.1345	0.0061062	0.000333323	PASS	missense_variant
1:175105998_C/T	11.2679	0.0025287	0.000224935	PASS	missense_variant
1:175299249_G/A	4.56866	0.019694	0.00437802	PASS	missense_variant
1:175304941_T/C	17.2216	0.011494	0.000674723	PASS	splice_region_variant
1:175335133_A/G	14.6138	0.0043618	0.000299688	PASS	missense_variant
1:175372447_C/T	6.70927	0.0016077	0.000239952	PASS	missense_variant
1:175958495_C/T	4.76009	0.0020709	6.03e-05	PASS	splice_region_variant
1:176012946_C/A	14.6896	0.0035162	0.000240154	MISS02	missense_variant
1:176054921_G/A	8.49715	0.0011542	0.000135972	PASS	missense_variant
1:176104219_T/C	7.11223	0.011406	0.00161959	MISS05	missense_variant
1:176145129_T/C	15.9748	0.0013825	3.01e-05	MISS02	missense_variant
1:176525591_T/A	15.3881	0.0050505	0.000329766	PASS	missense_variant
1:176563812_C/T	3.99206	0.001378	0.000179824	PASS	missense_variant
1:176708856_C/G	7.65441	0.0029844	0.000390907	PASS	missense_variant
1:176738779_G/A	13.1662	0.0013793	0.000104894	PASS	missense_variant
1:176837972_T/C	8.70404	0.0021048	0.00024227	MISS02	splice_region_variant
1:176903420_C/T	17.7142	0.0034435	0.000195025	PASS	missense_variant
1:176915162_C/T	10.7305	0.001607	0.000149979	PASS	missense_variant
1:176915167_C/G	9.19552	0.0013774	0.000149975	PASS	missense_variant
1:176926816_C/T	4.30312	0.0048254	0.000510725	PASS	missense_variant
1:176998787_C/T	4.89204	0.0052874	0.000462741	PASS	missense_variant
1:176998823_T/A	39.0961	0.0025299	6.49e-05	PASS	missense_variant
1:177030318_G/A	17.0611	0.0046019	0.000270905	PASS	missense_variant
1:177199021_G/T	11.4792	0.0044379	0.000388175	MISS02	missense_variant
1:177250267_C/G	9.45087	0.0018382	0.000194821	PASS	missense_variant
1:177927985_C/T	6.61141	0.0011537	3.02e-05	PASS	missense_variant
1:177930009_C/T	15.2094	0.016258	0.00108543	MISS02	missense_variant
[truncated: 23,848 more rows]
